# Supplementary material for: Antisense, but not sense, repeat expanded RNAs activate PKR/eIF2α-dependent ISR in C9ORF72 FTD/ALS
Source: eLife journal article supplement (doi:10.7554/elife.85902), 2023-04-19
Supplement: fig1-figsupp2-data1 [file Quantification of Fig 1 figure supple 2 A, B, C.xlsx]

## Sheet: Sheet1
		Fig 1-supplement 2A
		pPERK
		in_(C4G2)2	in_(C4G2)75
		1.00457	0.9597
		0.99543	0.89078
		Fig 1-supplement 2B
		SHSY5Y
		pPKR
		in_(C4G2)2	in_(C4G2)75
		1	11.4777
		1.44431	10.5712
		Fig 1-supplement 2C
		peIF2a
		in_(C4G2)2	in_(C4G2)75
		1	2.192
		1.02363	2.3112
