# Supplementary material for: Antisense, but not sense, repeat expanded RNAs activate PKR/eIF2α-dependent ISR in C9ORF72 FTD/ALS
Source: eLife journal article supplement (doi:10.7554/elife.85902), 2023-04-19
Supplement: fig2-data1 [file Quantification of Fig 2A, C, E.xlsx]

## Sheet: Sheet1
	Fig 2A
	Puromycin
	in_(C4G2)2	in_(C4G2)75
	79.9529	10.7697
	95.5841	10.0037
	91.8284	10.9327
	Fig 2C
	in_(C4G2)2	in_(C4G2)75
	4.309	3.888
	3.639	4.437
	7.143	2.841
	6.683	2.207
	5.669	0.42
	6.052	1.34
	7.774	3.151
	7.954	2.857
	5.79	2.261
	4.631	2.241
	3.464	4.707
	5.038	5.745
	7.015	3.785
	6.531	2.367
	5.069	4.917
	4.823	1.29
	4.862	1.433
	5.066	1.665
	3.197	4.061
	3.971	4.348
	5.277	2.706
	7.009	2.658
	6.053	3.982
	4.557	2.314
	3.38	3.658
	4.879	2.56
	3.983	3.657
	6.414	2.606
	5.704	1.731
	4.794	2.168
	4.506	2.448
	7.386	1.601
	6.819	1.499
	6.741	3.584
	5.453	3.43
	4.32	3.662
	5.944	3.739
	7.228	3.263
	4.704	1.267
	8.384
	5.453
	5.655
	4.567
	4.667
	5.384
	7.035
	Fig 2E
	FMRP			G3BP
	in_(C4G2)2	in_(C4G2)75		in_(C4G2)2	in_(C4G2)75
	3.84615	64.5833		3.19149	29.1667
	3.26695	51.0417		10.7843	23.1884
	3.32916	53.5323		0	45.283
