# Supplementary material for: Antisense, but not sense, repeat expanded RNAs activate PKR/eIF2α-dependent ISR in C9ORF72 FTD/ALS
Source: eLife journal article supplement (doi:10.7554/elife.85902), 2023-04-19
Supplement: fig3-data1 [file Quantification of Fig 3C, E, G.xlsx]

## Sheet: Sheet1
	Fig.3C
	in_(C4G2)2	in_(C4G2)75	(C4G2)75
	1	0.909482	0.987897
	1.009	0.97	0.973553
	1	0.966456	0.996765
	Fig.3E
	pPKR
	in_(C4G2)2	(C4G2)108RO	(C4G2)75	in_(C4G2)75
	1	12.9721	9.92552	15.17
	1.77788	12.3979	9.61193	15.1146
	0.920204	10.373	5.92299	14.1944
	peIF2a
	in_(C4G2)2	(C4G2)108RO	(C4G2)75	in_(C4G2)75
	1	5.86198	8.0993	12.3874
	1.19266	4.5802	5.35361	9.17985
	0.311295	9.23824	9.37308	7.37461
	Fig.3G
	(C4G2)2+CLT siRNA	(C4G2)2+PKR siRNA	(C4G2)108RO+CLT siRNA	(C4G2)108RO+PKR siRNA
	1	0.857	1.32491	1.08059
	1	0.95	1.20053	0.977849
	1	0.976789	1.1966	0.9996
