# Supplementary material for: Antisense, but not sense, repeat expanded RNAs activate PKR/eIF2α-dependent ISR in C9ORF72 FTD/ALS
Source: eLife journal article supplement (doi:10.7554/elife.85902), 2023-04-19
Supplement: fig3-figsupp1-data1 [file Quantification of Fig 3-supplement 1-B, G, H.xlsx]

## Sheet: Sheet1
	Fig 3-supplement 1B
	in_(C4G2)75	GFP-PR50	GFP-PA50	GFP-GP80
	74	21.4	10.71	7.14
	72.3	15.7	33.3	10.7
	Fig 3-supplement 1G
	(C4G2)108RO
	CLT siRNA	PKR siRNA
	1	0.35676
	1	0.3226
	1	0.48653
	1	0.396543
	Fig 3-supplement 1H
	(C4G2)108RO
	PKR
	CLT siRNA	PKR siRNA
	1.15612	0.132583
	0.998834	0.277098
	peIF2a
	CLT siRNA	PKR siRNA
	1.53445	0.235251
	1.27483	0.189518
