# Supplementary material for: Antisense, but not sense, repeat expanded RNAs activate PKR/eIF2α-dependent ISR in C9ORF72 FTD/ALS
Source: eLife journal article supplement (doi:10.7554/elife.85902), 2023-04-19
Supplement: fig4-data1 [file Quantification of Fig4 B, C, F, G.xlsx]

## Sheet: Sheet1
	Fig 4B
	FMRP
	in_(C4G2)2	(C4G2)108RO
	7	42
	11	37
	10	55
	Fig 4C
	G3BP
	in_(C4G2)2	(C4G2)108RO
	7	45
	11	38
	10	58
	Fig 4F
	(C4G2)108RO+CLT siRNA	(C4G2)108RO+PKR siRNA
	54.9744	20.6085
	49.9071	11.8603
	50.132	6.38133
	Fig 4G
	Time (h)	(C4G2)108RO+PKR siRNA	(C4G2)108RO+CLT siRNA	(C4G2)2+CLT siRNA	(C4G2)2+PKR siRNA
	168	0
	168	0
	168	0
	168	0
	168	1
	168	0
	168	0
	168	0
	168	0
	168	0
	144	1
	72	1
	168	0
	168	0
	72	1
	48	1
	168	0
	168	0
	168	1
	96	1
	168	0
	168	0
	48	1
	168	0
	168	0
	168	0
	168	0
	168	0
	168	0
	168	0
	168	0
	72	1
	168	0
	168	0
	168	0
	168	1
	168	0
	168	0
	168	0
	168	0
	48	1
	168	0
	168	0
	168	0
	168	1
	168	0
	168	0
	168	0
	168	0
	168	0
	168	0
	168	0
	168	0
	168	0
	168	1
	96	1
	168	0
	168	0
	168	0
	168	0
	168	0
	168	0
	168	0
	168	0
	168	0
	96	1
	168	0
	168	0
	72	1
	48	1
	168	0
	168	0
	144	1
	168	0
	168	0
	48	1
	48	1
	48	1
	168	0
	168	0
	168	0
	168	0
	48	1
	168	0
	168	0
	168	0
	168	0
	168	0
	96	1
	168	0
	168	0
	168	0
	168	0
	168	0
	48	1
	168	0
	48	1
	48	1
	168	0
	168	0
	168	0
	168	0
	48	1
	168	0
	168	0
	48	1
	168	0
	168	0
	168	0
	168	0
	168	0
	168	0
	48	1
	168	0
	120	1
	48	1
	168	0
	168	0
	168	0
	144	1
	168	0
	48	1
	48	1
	48	1
	168	0
	120	1
	168	0
	168	0
	96	1
	48	1
	168	0
	168	1
	168	0
	144	1
	72	1
	168	0
	48	1
	144	1
	48	1
	168	0
	168	0
	48	1
	168	0
	168	0
	48	1
	72	1
	72	1
	48	1
	168	0
	168	0
	168	0
	168	1
	48	1
	48	1
	168	0
	168	1
	144	1
	168	0
	120	1
	168	0
	168	0
	144	1
	120	1
	96	1
	144	1
	168	1
	48	1
	96	1
	168	1
	168	0
	120	1
	120	1
	168	0
	168	0
	168	0
	168	0
	144	1
	72	1
	48	1
	168	0
	168	1
	168	0
	48	1
	48	1
	48	1
	168	0
	168	1
	48	1
	72	1
	168	0
	168	0
	144	1
	168	0
	48	1
	96	1
	168	0
	168	0
	48	1
	48	1
	168	0
	144	1
	96	1
	48	1
	168	0
	48	1
	168	0
	120	1
	168	0
	72	1
	168	0
	48	1
	120	1
	120	1
	168	0
	120	1
	168	0
	48	1
	168	0
	120	1
	48	1
	96	1
	144	1
	168	0
	168	0
	168	0
	72	1
	48	1
	48	1
	72	1
	168	0
	168	0
	168	0
	72	1
	120	1
	72	1
	48	1
	168	0
	168	0
	48	1
	168	1
	48	1
	168	0
	72	1
	48	1
	48	1
	48	1
	168	0
	168	0
	168	0
	120	1
	168	0
	168	0
	120	1
	96	1
	96	1
	168	0
	72	1
	120	1
	168	0
	168	0
	120	1
	120	1
	48	1
	168	0
	168	0
	96	1
	168	0
	168	0
	48	1
	168	1
	168	0
	96	1
	168	0
	168	0
	48	1
	120	1
	168	0
	168	0
	168	0
	168	0
	144	1
	168	0
	168	0
	168	0
	120	1
	168	1
	72	1
	144	1
	48	1
	168	1
	168	1
	168	0
	144	1
	120	1
	168	0
	120	1
	120	1
	48	1
	48	1
	72	1
	168		0
	48		1
	168		0
	96		1
	168		0
	168		0
	48		1
	48		1
	48		1
	48		1
	168		0
	120		1
	168		0
	48		1
	168		0
	48		1
	48		1
	120		1
	96		1
	48		1
	120		1
	96		1
	168		0
	48		1
	168		0
	168		0
	120		1
	96		1
	72		1
	48		1
	168		0
	168		0
	48		1
	72		1
	168		0
	168		0
	168		1
	120		1
	72		1
	168		0
	48		1
	72		1
	168		0
	120		1
	168		0
	72		1
	120		1
	96		1
	48		1
	168		0
	48		1
	48		1
	168		0
	168		0
	72		1
	48		1
	72		1
	48		1
	168		0
	168		0
	48		1
	168		0
	48		1
	48		1
	72		1
	96		1
	168		0
	48		1
	48		1
	168		0
	48		1
	168		0
	168		0
	168		0
	48		1
	96		1
	48		1
	168		0
	168		0
	48		1
	168		0
	48		1
	168		0
	48		1
	168		0
	168		0
	168		0
	168		0
	168		0
	168		0
	48		1
	48		1
	168		0
	48		1
	144		1
	72		1
	48		1
	48		1
	96		1
	72		1
	48		1
	48		1
	48		1
	48		1
	72		1
	168		0
	168		0
	168		0
	120		1
	168		0
	48		1
	168		0
	144		1
	168		0
	168		1
	168		0
	168		0
	168		0
	168		0
	96		1
	168		0
	168		1
	144		1
	168		0
	168		0
	48		1
	168		0
	96		1
	168		0
	48		1
	96		1
	168		0
	72		1
	168		0
	168		0
	168		0
	168		0
	48		1
	120		1
	168		0
	48		1
	120		1
	168		0
	48		1
	168		0
	168		0
	168		0
	168		0
	168		0
	120		1
	168		0
	168		0
	168		0
	168		0
	96		1
	168		0
	168		0
	96		1
	48		1
	96		1
	168		0
	48		1
	168		0
	168		0
	48		1
	48		1
	168		0
	168		1
	168		0
	168		0
	168		0
	168		0
	168		0
	96		1
	48		1
	120			1
	168			0
	168			0
	168			0
	168			0
	168			0
	144			1
	168			0
	168			0
	168			0
	168			0
	168			0
	168			0
	96			1
	168			0
	168			0
	168			0
	168			0
	168			0
	96			1
	168			0
	72			1
	168			0
	96			1
	168			0
	168			0
	168			0
	96			1
	168			0
	120			1
	168			0
	168			0
	72			1
	168			0
	168			0
	168			0
	144			1
	168			0
	168			0
	168			0
	96			1
	144			1
	168			0
	168			0
	168			0
	168			0
	168			0
	144			1
	144			1
	168			0
	48			1
	168			0
	168			0
	168			0
	96			1
	168			0
	168			0
	168			0
	144			1
	168			0
	168			0
	168			0
	168			0
	168			0
	168			0
	168			0
	168			0
	168			0
	168			0
	168			0
	168			0
	168			0
	96			1
	48			1
	168			0
	168			0
	168			0
	96			1
	168			0
	168			1
	168			0
	96			1
	96			1
	168			0
	168			0
	144			1
	168			0
	168			0
	168			0
	168			0
	48			1
	168			0
	168			0
	168			0
	168			0
	96			1
	72			1
	72			1
	168			0
	48			1
	168			1
	168			0
	168			0
	120			1
	168			0
	168			0
	168			0
	168			0
	96			1
	168			0
	168			0
	168			0
	168			0
	168			0
	168			0
	168			0
	96			1
	144			1
	168			0
	168			1
	168			0
	168			0
	168			1
	120			1
	168			0
	168			0
	168			0
	144			1
	168			0
	168			0
	168			0
	168			0
	168			0
	48			1
	168			0
	72			1
	168			0
	168			0
	168			0
	168			0
	168			0
	168			0
	168			0
	168			0
	168			0
	168			0
	168			0
	168			0
	144			1
	168			0
	120			1
	120			1
	168			0
	168			0
	168			0
	168			0
	120			1
	168			0
	168			0
	168			0
	168			0
	168			0
	168			0
	72			1
	120			1
	48			1
	48			1
	168			0
	168			0
	168			0
	168			0
	168			0
	168			0
	168			0
	168			0
	168			0
	168			0
	168			0
	168			0
	168			0
	168			0
	144			1
	168			0
	168			0
	168			0
	48			1
	168			0
	168			0
	168			0
	168			0
	168			0
	168			0
	96			1
	168				0
	96				1
	144				1
	168				0
	96				1
	168				0
	168				0
	120				1
	168				0
	168				0
	72				1
	168				0
	168				0
	168				1
	168				0
	168				0
	168				0
	168				0
	168				0
	48				1
	168				0
	168				0
	168				0
	168				0
	168				0
	168				0
	168				0
	168				0
	168				0
	168				0
