# Supplementary material for: Antisense, but not sense, repeat expanded RNAs activate PKR/eIF2α-dependent ISR in C9ORF72 FTD/ALS
Source: eLife journal article supplement (doi:10.7554/elife.85902), 2023-04-19
Supplement: fig5-data1 [file Quantification of Fig5 C.xlsx]

## Sheet: Sheet1
		Fig 5C
		peIF2a
		Control	C9ALS/FTD
		0.983	1.1171
		0.4498	1.0804
		0.3573	0.8204
		0.5818	1.5435
		0.2419	2.19786
		0.37299	1.42853
