# Supplementary material for: Antisense, but not sense, repeat expanded RNAs activate PKR/eIF2α-dependent ISR in C9ORF72 FTD/ALS
Source: eLife journal article supplement (doi:10.7554/elife.85902), 2023-04-19
Supplement: fig5-figsupp1-data1 [file Fig 5-figure supple 1.xlsx]

## Sheet: Sheet1
	Fig 5-supplement 1B
	peIF2a
	C9-1iso	C9-1	C9-2iso	C9-2
	0.850762	0.827205	0.925435	0.814105
	0.925435	0.948091	0.856641	0.990345
	1.22252	1.29649	1.21792	1.22282
	pPKR
	C9-1iso	C9-1	C9-2iso	C9-2
	1.10915	0.998683	1.13491	0.975985
	0.851933	0.815214	0.742936	0.76563
	1.03892	1.0494	1.12215	1.134
