# Supplementary material for: Antisense, but not sense, repeat expanded RNAs activate PKR/eIF2α-dependent ISR in C9ORF72 FTD/ALS
Source: eLife journal article supplement (doi:10.7554/elife.85902), 2023-04-19
Supplement: fig6-data2 [file Fig 6-figure supple 1.xlsx]

## Sheet: Sheet1
	Fig 6-supplement 1B
	peIF2a
	Control	(G4C2)75
	0.1459	1.1443
	0.132	1.307
	pPKR
	Control	(G4C2)75
	0.069	0.86728
	0.099	0.8433
	Fig 6-supplement 1D
	sense foci
	(G4C2)75 + CLT ASO	(G4C2)75 + SE ASO
	44.0966	25.3968
	69.8213	25
	41.5716	27.027
	antisense foci
	(G4C2)75 + CLT ASO	(G4C2)75 + SE ASO
	32.0556	31.9444
	49.9528	25.4237
	23.1363	30.2083
	Fig 6-supplement 1E
	sense foci
	(G4C2)75 + CLT ASO	(G4C2)75 + AS ASO 1	(G4C2)75 + AS ASO 2
	44.0966	28.7841	28.3157
	69.8213	35.5546	55.8104
	41.5716	41.5163	41.9747
	antisense foci
	(G4C2)75 + CLT ASO	(G4C2)75 + AS ASO 1	(G4C2)75 + AS ASO 2
	32.0556	14.9402	13.3654
	49.9528	3.80785	1.1
	23.1363	1.46258	1.3
