# Supplementary material for: Antisense, but not sense, repeat expanded RNAs activate PKR/eIF2α-dependent ISR in C9ORF72 FTD/ALS
Source: eLife journal article supplement (doi:10.7554/elife.85902), 2023-04-19
Supplement: fig7-figsupp1-data1 [file Fig 7-figure supple 1.xlsx]

## Sheet: Sheet1
	Fig 7-supplement 1B
	GFP	70AS	70AS+ctrl MO	70AS+PKR MO
	100	91.2443	93.6552	91.5675
	100	90.8693	94.1133	95.5006
	100	95.4661	91.712	96.5478
	100	91.9268	91.5866	93.7898
	Fig 7-supplement 1C
	GFP	70AS	70AS+ctrl MO	70AS+PKR MO
	20	46.67	33.33	26.67
	13.33	40	40	13.33
	20	53.33	46.67	26.67
	6.67	26.67	60	26.67
