# Supplementary material for: Antisense, but not sense, repeat expanded RNAs activate PKR/eIF2α-dependent ISR in C9ORF72 FTD/ALS
Source: eLife journal article supplement (doi:10.7554/elife.85902), 2023-04-19
Supplement: figures [file elife-85902-figures-v2.pdf]

---

## Figures and figure supplements

Antisense, but not sense, repeat expanded RNAs activate PKR/eIF2 $\alpha$ -dependent ISR in *C9ORF72* FTD/ALS

**Janani Parameswaran *et al.***

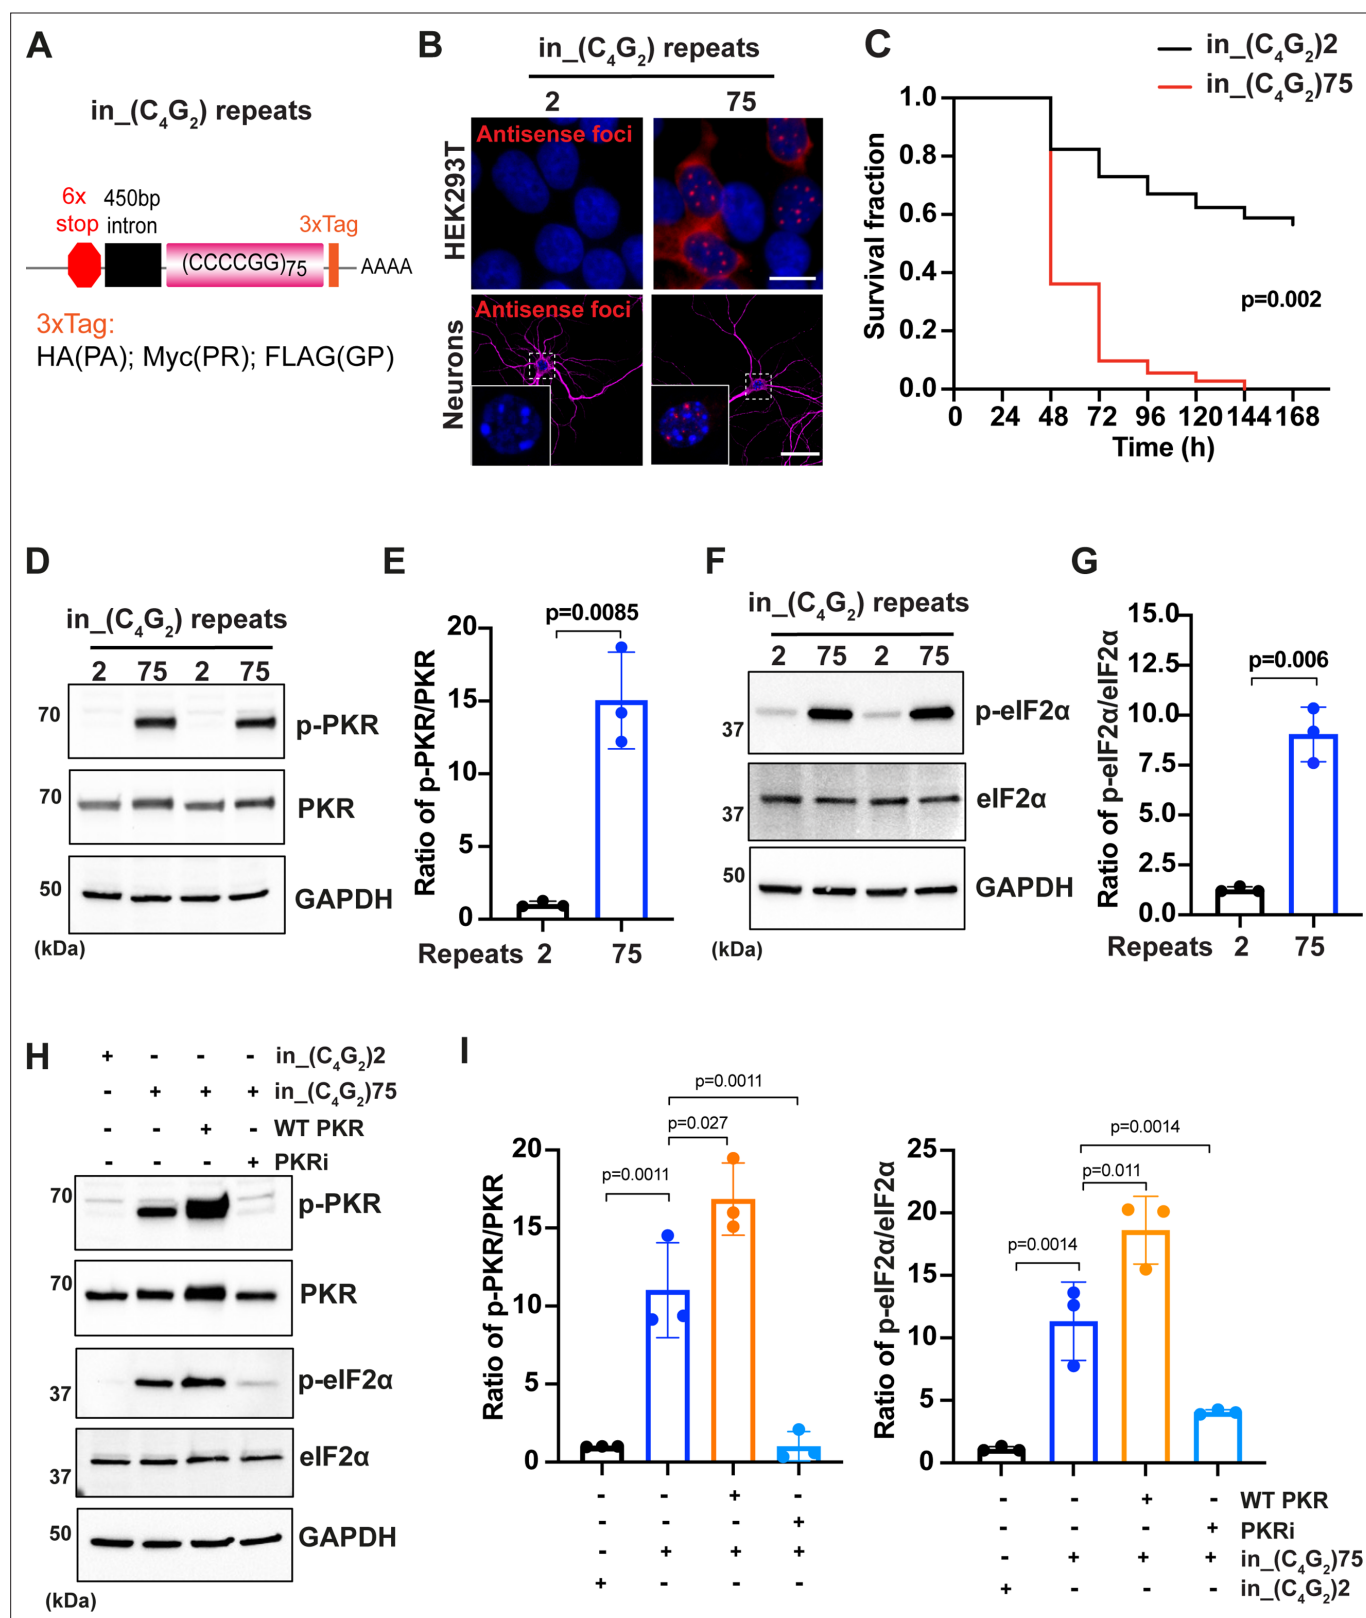

**Figure 1.** C9ORF72 antisense C<sub>4</sub>G<sub>2</sub> expanded repeats activate PKR/eIF2α-dependent integrated stress response and cause neuronal toxicity. (A) Schematic illustration of the in<sub>-(C<sub>4</sub>G<sub>2</sub>)75 repeat construct including 6× stop codons, 450 bp of human intronic sequences at the N-terminus and 3× protein tags at the C-terminus of the repeats to monitor the DPR proteins in each frame. (B) Representative images of antisense RNA foci in HEK293T cells and in primary cortical neurons expressing in<sub>-(C<sub>4</sub>G<sub>2</sub>)75 detected by RNA FISH. Red, foci; blue, DAPI; magenta, MAP2. (C) Kaplan–Meier curves</sub></sub>

Figure 1 continued on next page

*Figure 1 continued*

showing increased risk of cell death in in<sub>-(C<sub>4</sub>G<sub>2</sub>)75</sub>-expressing primary cortical neurons compared with neurons expressing 2 repeats. Statistical analyses were performed using Mantel–Cox test (replicated three times with similar results). **(D, E)** Immunoblotting analysis of phosphorylated PKR (p-PKR) and total PKR in HEK293T cells expressing in<sub>-(C<sub>4</sub>G<sub>2</sub>)75</sub> or 2 repeats. p-PKR levels were detected using anti-p-PKR (T446) and normalized to total PKR. GAPDH was used as a loading control. Error bars represent SD (n = 3 independent experiments). Statistical analyses were performed using Student's t-test. **(F, G)** Immunoblotting analysis of phosphorylated eIF2 $\alpha$  (p-eIF2 $\alpha$ ) and total eIF2 $\alpha$  in HEK293T cells expressing in<sub>-(C<sub>4</sub>G<sub>2</sub>)75</sub> or 2 repeats. p-eIF2 $\alpha$  levels were detected using anti-phosphor eIF2 $\alpha$  (Ser51) and normalized to total eIF2 $\alpha$ . GAPDH was used as a loading control. Error bars represent SD (n = 3 independent experiments). Statistical analyses were performed using Student's t-test. **(H, I)** Immunoblotting analysis of p-PKR and p-eIF2 $\alpha$  in HEK293T cells expressing in<sub>-(C<sub>4</sub>G<sub>2</sub>)75</sub>, with or without co-expression of wild type PKR, or treatment of a PKR inhibitor, C16. Error bars represent SD (n = 3 independent experiments). Statistical analyses were performed using one-way ANOVA with Tukey's post hoc test. Scale bars: 10  $\mu$ m (neurons), 20  $\mu$ m (HEK293T).

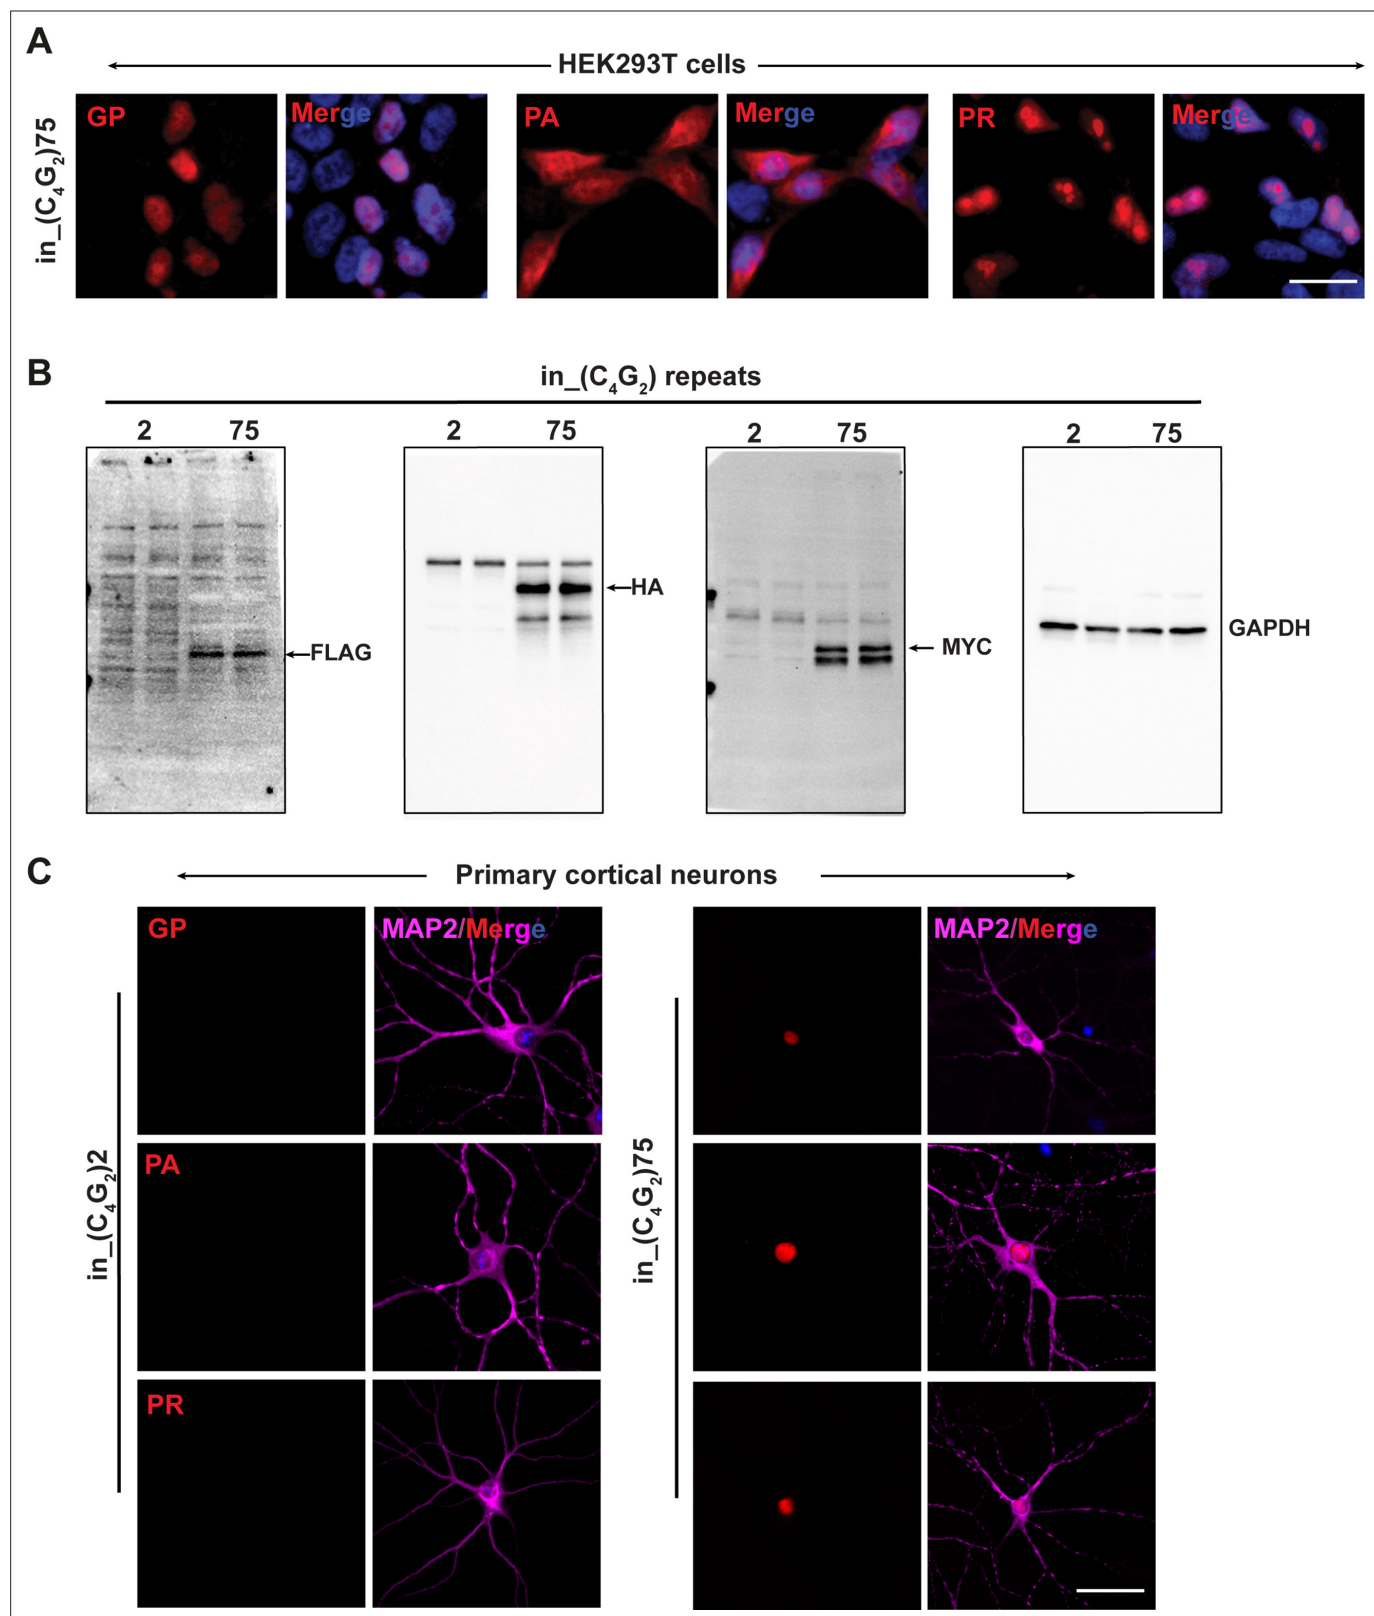

**Figure 1—figure supplement 1.** C9ORF72 C<sub>4</sub>G<sub>2</sub> repeat expanded repeats produce antisense DPR proteins in HEK293T cells and primary neurons. (A) Representative images of DPR protein staining in HEK293T expressing in\_(C<sub>4</sub>G<sub>2</sub>)75 repeats using DPR antibodies. Red, GP, PA, and PR; blue, DAPI. (B) Immunoblotting of DPR proteins in HEK293T expressing in\_(C<sub>4</sub>G<sub>2</sub>)75 repeats using TAG antibodies. GAPDH was used as a loading control. (C) Representative images of DPR protein staining in primary neurons expressing in\_(C<sub>4</sub>G<sub>2</sub>)75 repeats using DPR antibodies. Red, GP, PA, and PR; blue, DAPI; MAP2, magenta. Scale bars, 10  $\mu$ m (neurons), 20  $\mu$ m (HEK293T).



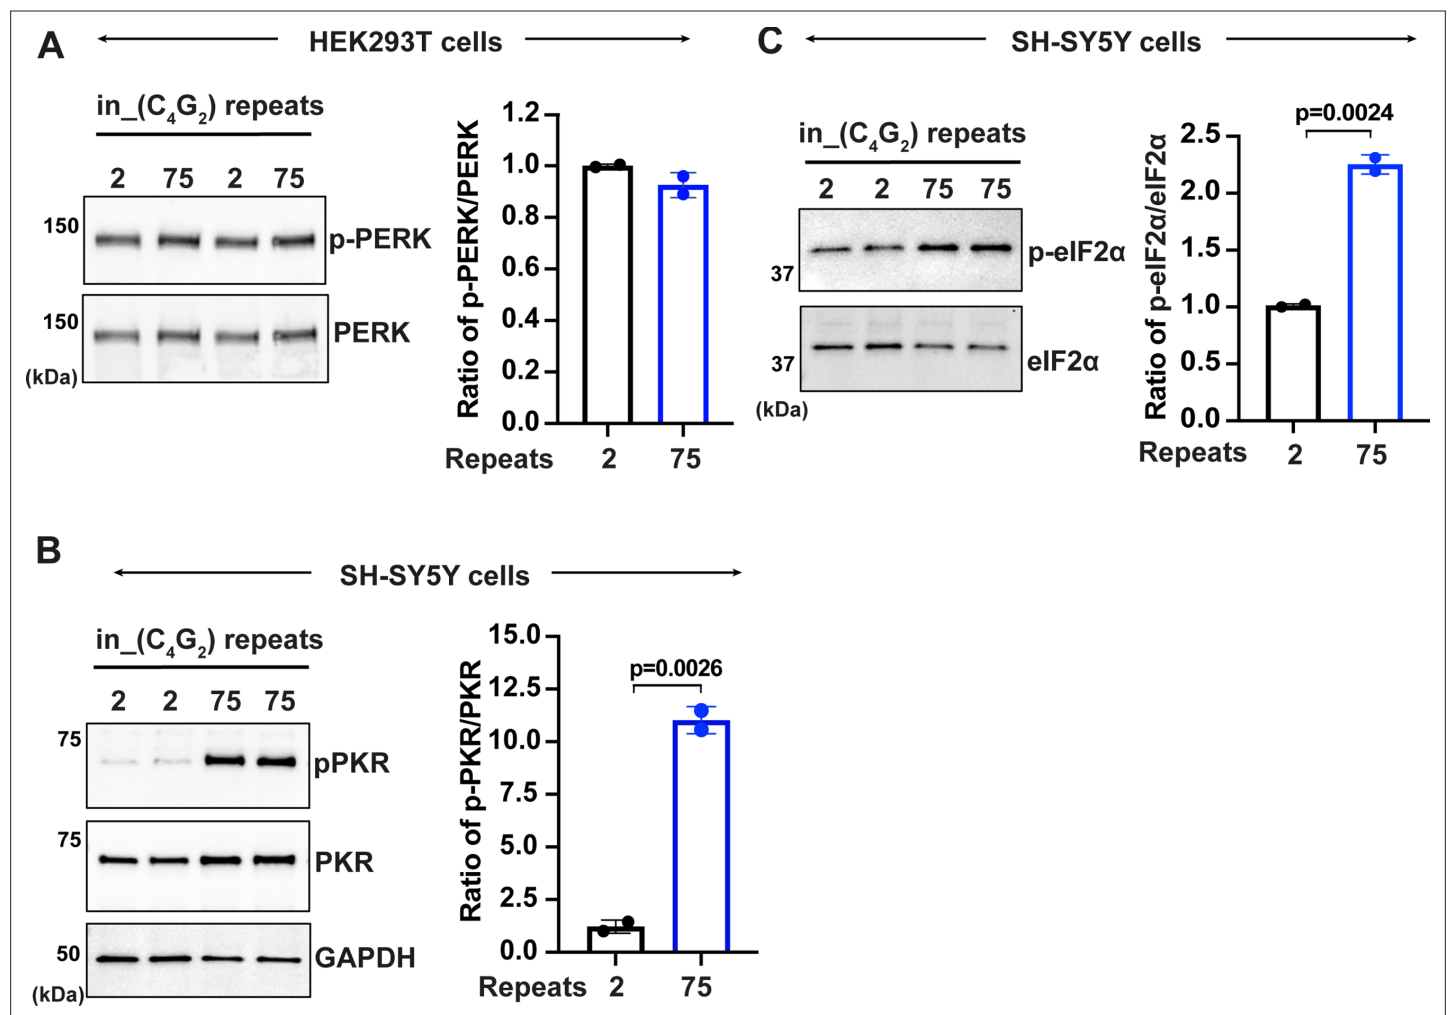

**Figure 1—figure supplement 2.** C9ORF72 C<sub>4</sub>G<sub>2</sub> repeat expanded repeats activate PKR/eIF2α-dependent integrated stress response in SH-SY5Y cells. (A) Immunoblotting of p-PERK in HEK293T cells expressing in\_(C<sub>4</sub>G<sub>2</sub>)75 or (C<sub>4</sub>G<sub>2</sub>)2 repeats. Phosphorylated PERK levels were quantified and normalized to total PERK. GAPDH was used as a loading control. Error bars represent SD (n = 2 independent experiments). Statistical analyses were performed using Student's t-test. (B, C) Immunoblotting of p-PKR and p-eIF2α in SH-SY5Y cells expressing (C<sub>4</sub>G<sub>2</sub>)75 or (C<sub>4</sub>G<sub>2</sub>)2 repeats. p-PKR (T446) and p-eIF2α (Ser51) were normalized to total PKR and eIF2α, respectively. GAPDH was used as a loading control. Error bars represent SD (n = 2 independent experiments). Statistical analyses were performed using Student's t-test.

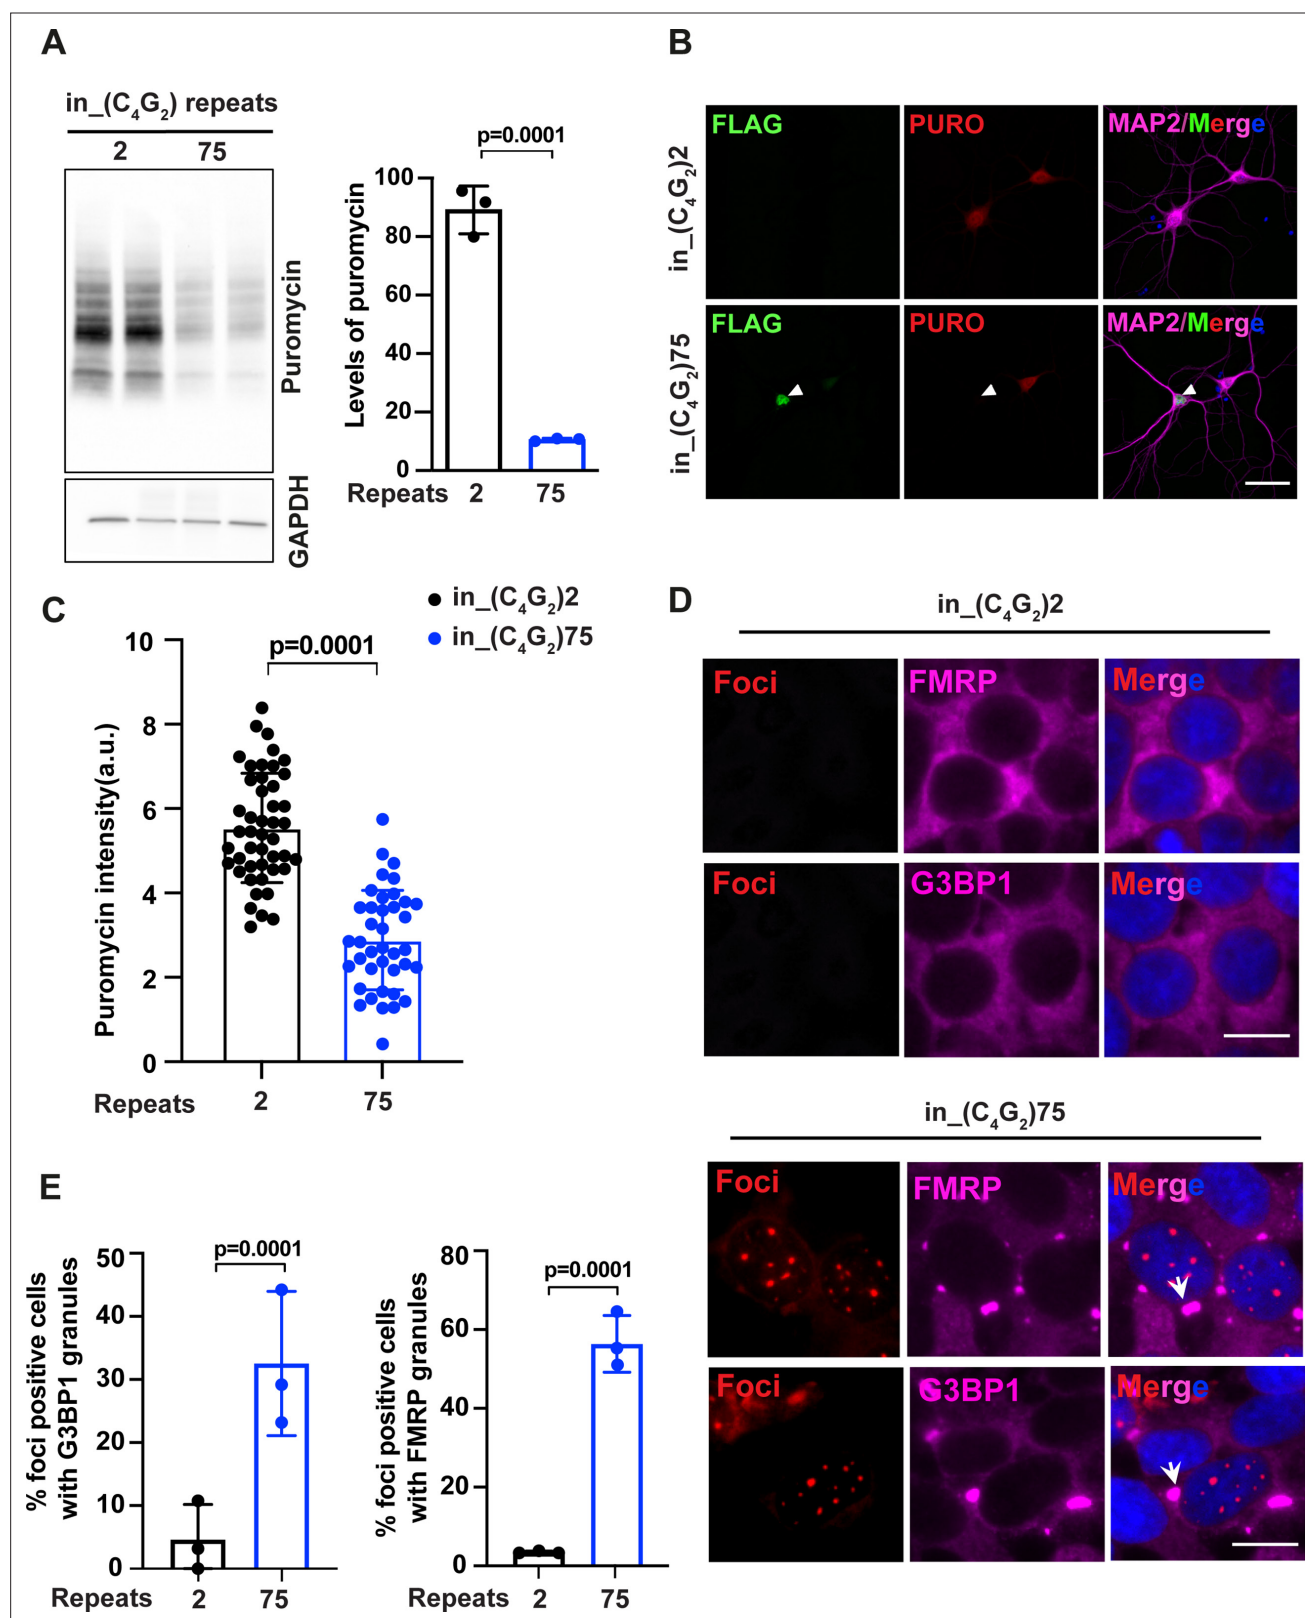

**Figure 2.** C9ORF72 antisense C<sub>4</sub>G<sub>2</sub> expanded repeats inhibit global protein synthesis and induce stress granule assembly. **(A)** Immunoblotting of puromycin in HEK293T cells expressing in\_(C<sub>4</sub>G<sub>2</sub>)75 or 2 repeats. Cells were incubated with puromycin for 30 min before harvesting. The level of puromycin was normalized to GAPDH. Error bars represent SD (n = 3 independent experiments). Statistical analyses were performed using Student's t-test **(B)** Representative images and **(C)** quantification of primary neurons expressing either (C<sub>4</sub>G<sub>2</sub>)75 or 2 repeats stained with anti-puromycin (red),

Figure 2 continued on next page

*Figure 2 continued*

anti-FLAG (green), DAPI (blue), and MAP2 (magenta). The puromycin intensity was quantified using ImageJ. Error bars represent SD (n = 40–50 neurons/group; similar results were obtained from two independent experiments). Statistical analyses were performed using Student's *t*-test. **(D)** Representative images of G3BP1 and FMRP staining in HEK293T cells expressing in\_(C<sub>4</sub>G<sub>2</sub>)<sub>75</sub> and in\_(C<sub>4</sub>G<sub>2</sub>)<sub>2</sub> repeats. **(E)** Quantification of antisense foci-positive cells with G3BP1 and FMRP granules. Error bars represent SD (n = 150 cells/condition and three independent experiments). Statistical analyses were performed using Student's *t*-test. Scale bars, 10 μm (neurons), 20 μm (HEK293T).

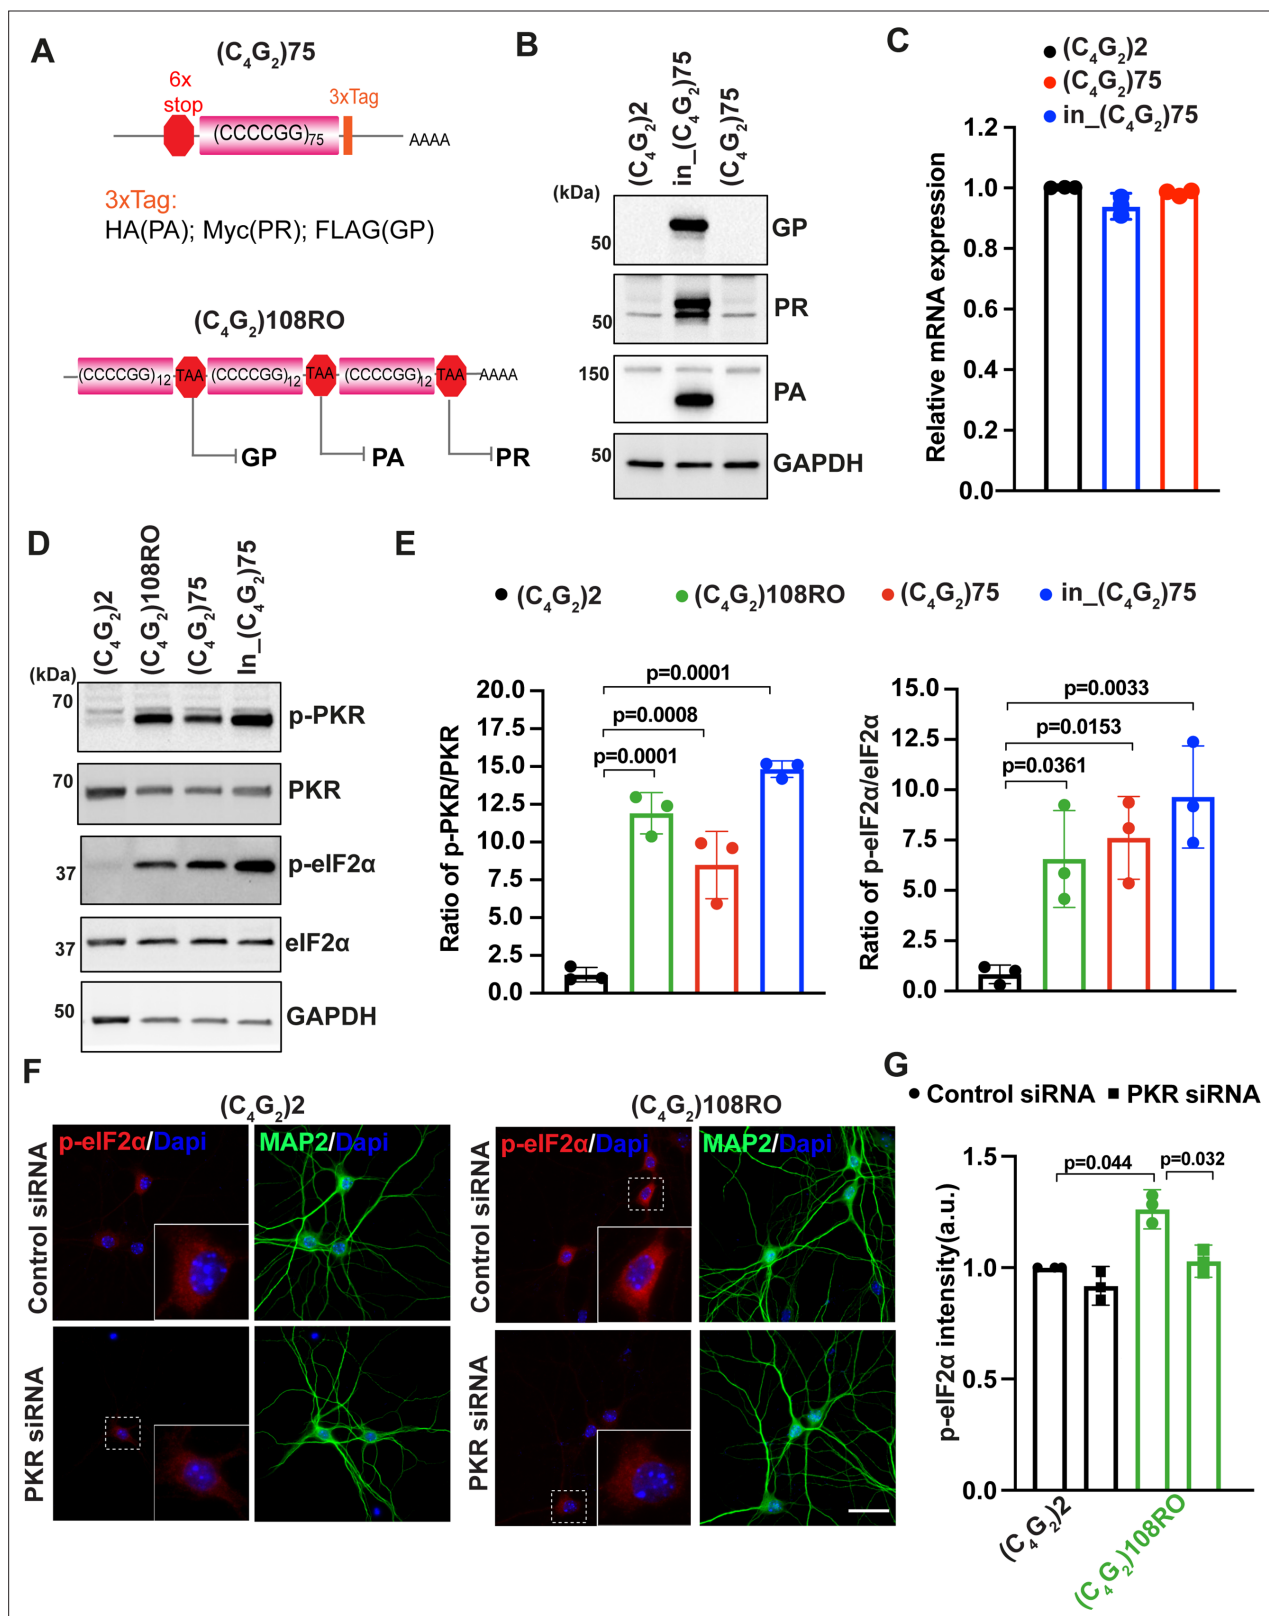

**Figure 3.** Antisense  $C_4G_2$  repeat expanded RNAs activate the PKR/eIF2 $\alpha$  pathway independent of DPR proteins. **(A)** (Top) Schematic illustration of  $(C_4G_2)_{75}$  repeats without the human intronic sequences. 3 $\times$  protein tags were included at the C-terminus of the repeats to monitor the DPR proteins in each frame. (Bottom) Schematic illustration of antisense  $(C_4G_2)_{108RO}$  repeats with stop codons inserted in every 12 repeats to prevent the translation of DPR proteins from all reading frames. **(B)** Immunoblotting of DPR proteins in HEK293T cells expressing  $in_{(C_4G_2)75}$ ,  $(C_4G_2)_{75}$ , or 2 repeats. DPR

Figure 3 continued on next page

*Figure 3 continued*

protein levels were detected using anti-FLAG (frame with GP), anti-MYC (frame with PR), and anti-HA (frame with PA). GAPDH was used as a loading control. **(C)** mRNA levels were measured by quantitative qPCR in cell expressing in<sub>1</sub>(C<sub>4</sub>G<sub>2</sub>)75, (C<sub>4</sub>G<sub>2</sub>)75, or 2 repeats. Error bars represent SD (n = 3). **(D, E)** Immunoblotting of p-PKR and p-eIF2 $\alpha$  in HEK293T cells expressing in<sub>1</sub>(C<sub>4</sub>G<sub>2</sub>)75, (C<sub>4</sub>G<sub>2</sub>)75, (C<sub>4</sub>G<sub>2</sub>)108RO, or 2 repeats. p-PKR (T446) and p-eIF2 $\alpha$  (Ser51) were normalized to total PKR and eIF2 $\alpha$ , respectively. GAPDH was used as a loading control. Error bars represent SD (n = 3 independent experiments). Statistical analyses were performed using one-way ANOVA with Tukey's post hoc test. **(F, G)** Representative images **(F)** and quantitation **(G)** of p-eIF2 $\alpha$  in primary neurons expressing antisense (C<sub>4</sub>G<sub>2</sub>)108RO or 2 repeats in the presence and absence of PKR siRNA. Scale bars, 10  $\mu$ m.

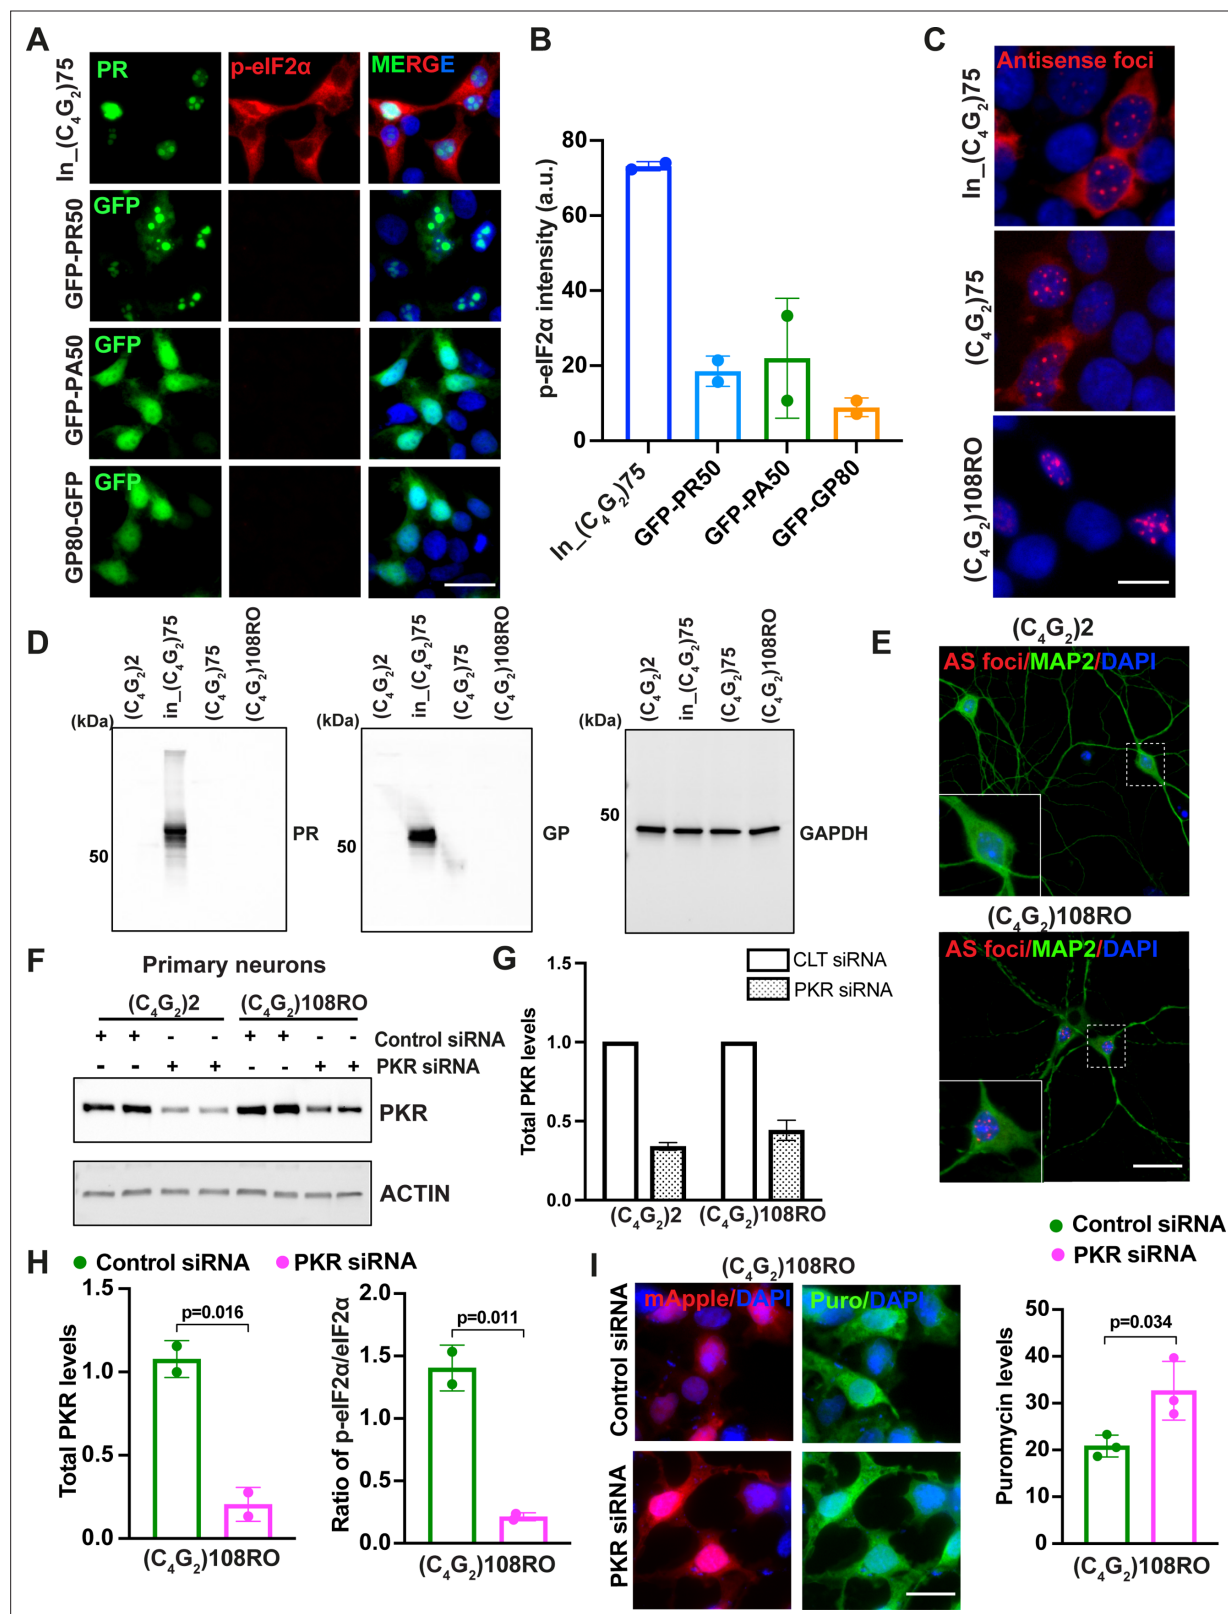

**Figure 3—figure supplement 1.** Antisense DPR proteins do not activate PKR/eIF2 $\alpha$ -dependent integrated stress response. (A) Representative images and (B) quantification of p-eIF2 $\alpha$  staining in HEK293T cells expressing  $in\_ (C_4G_2)75$ , PR50, PA50, or GP80. Green, GP, PA, or PR; red, p-eIF2 $\alpha$ ; blue, DAPI. Error bars represent SD (n = 2 independent experiments). (C) Representative images of antisense RNA foci in HEK293T cells expressing  $in\_ (C_4G_2)75$ ,  $(C_4G_2)75$  or  $(C_4G_2)108RO$  repeats. Foci were detected by RNA FISH. Red, foci; blue, DAPI. (D) Immunoblotting of DPR proteins in HEK293T cells

Figure 3—figure supplement 1 continued on next page

*Figure 3—figure supplement 1 continued*

expressing in  $(C_4G_2)_{75}$ ,  $(C_4G_2)_{75}$  and  $(C_4G_2)_{108RO}$  repeats. DPR protein levels were detected using anti-PR and anti-GP antibodies. GAPDH was used as a loading control. **(E)** Representative images of antisense RNA foci in primary cortical neurons expressing  $(C_4G_2)_{108}$  detected by RNA FISH. Red, foci; blue, DAPI; Green, MAP2. **(F)** Immunoblotting and **(G)** quantification of PKR in primary neurons expressing  $(C_4G_2)_2$  and  $(C_4G_2)_{108RO}$  together with control or PKR siRNA. PKR were normalized to GAPDH. Error bars represent SD. **(H)** The levels of PKR and p-eIF2 $\alpha$  (Ser51) in HEK293T cells expressing  $(C_4G_2)_{108RO}$  together with control or PKR siRNA. PKR and p-eIF2 $\alpha$  (Ser51) were normalized to GAPDH and total eIF2 $\alpha$ , respectively. Error bars represent SD (n = 2 independent experiments). Statistical analyses were performed using Student's *t*-test. **(I)** Representative images and quantification of puromycin staining in HEK293T cells expressing  $(C_4G_2)_{108RO}$  together with control or PKR siRNA. Error bars represent SD (n = 3 independent experiments). mApple was co-transfected to identify cells with  $(C_4G_2)_{108RO}$  expression. Statistical analyses were performed using Student's *t*-test. Scale bars, 20  $\mu$ m (HEK293T), 10  $\mu$ m (neurons).



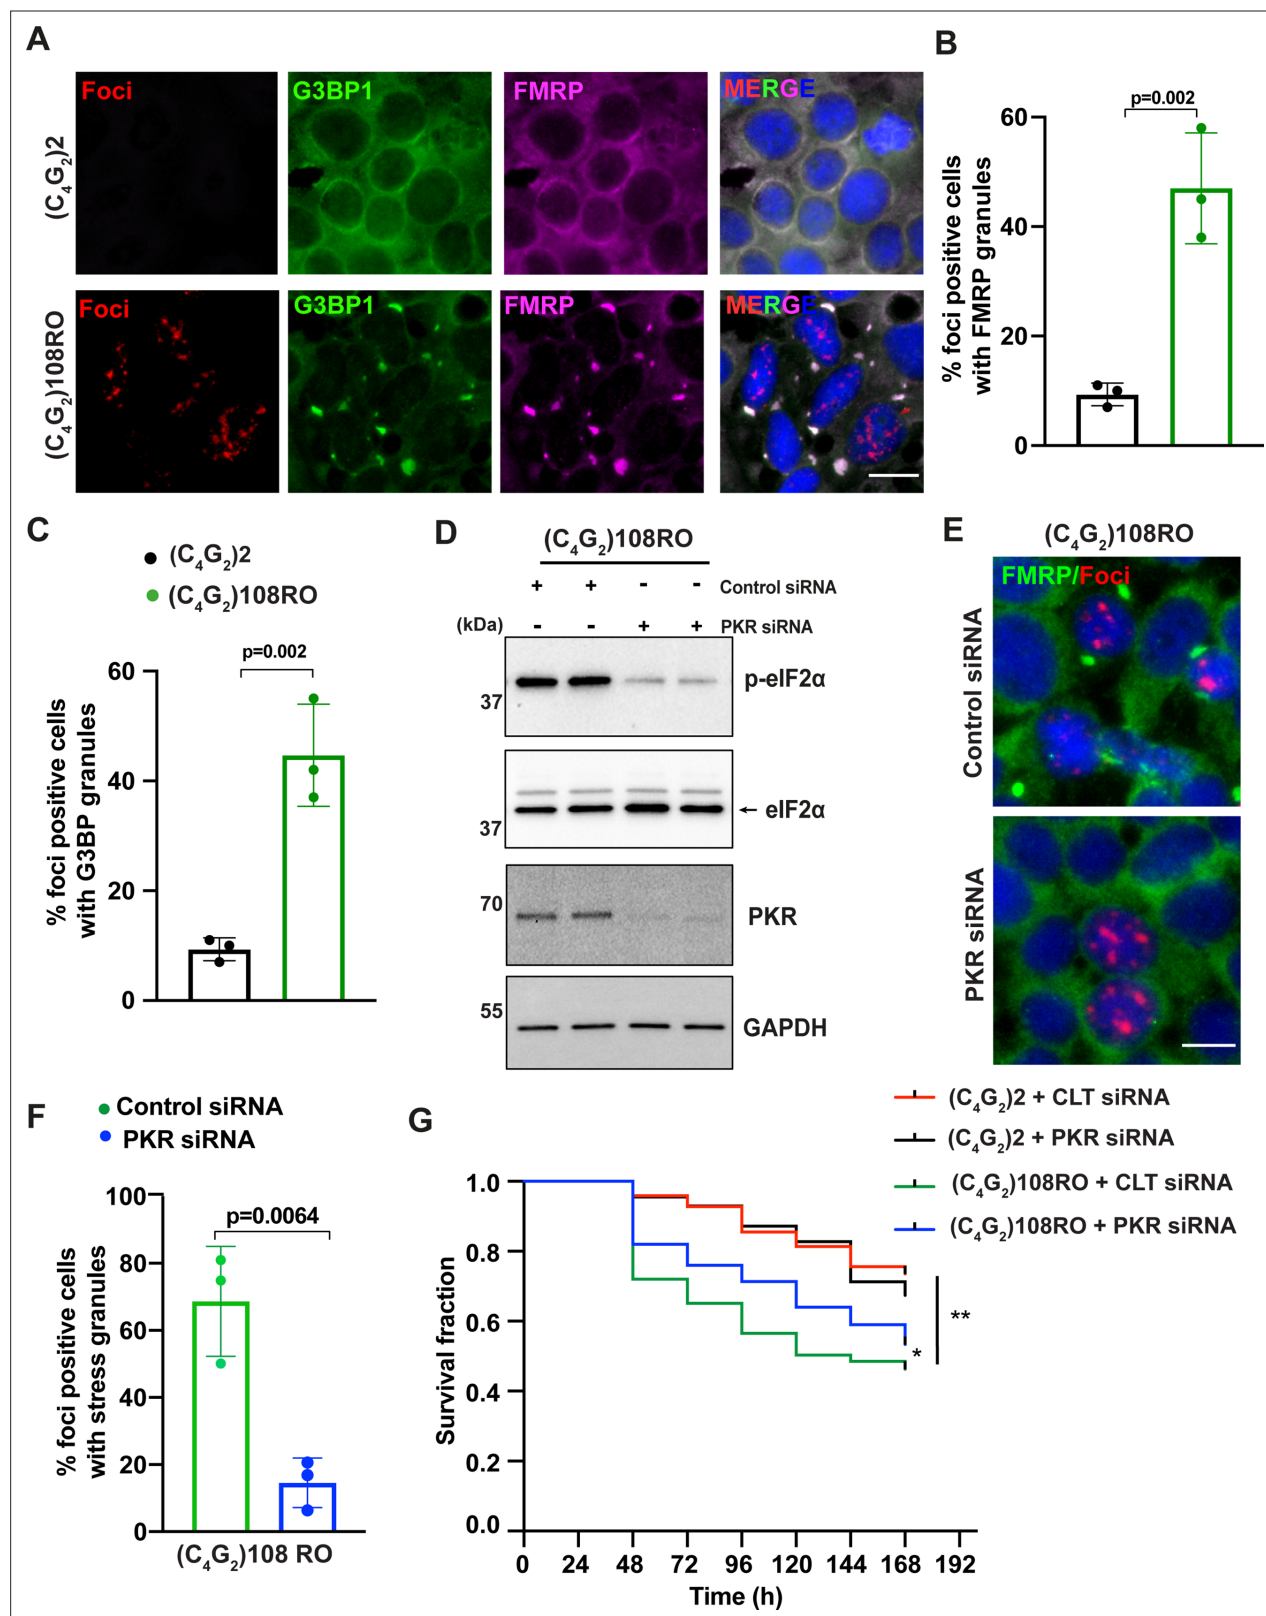

**Figure 4.** Antisense  $C_4G_2$  repeat expanded RNAs themselves induce stress granules and lead to neuronal toxicity. **(A)** Representative images of FMRP and G3BP1 staining in HEK293T cells expressing  $(C_4G_2)_{108RO}$  or 2 repeats. **(B, C)** Quantification of antisense foci-positive cells with FMRP and G3BP1 granules. Error bars represent SD ( $n = 180$  cells/condition and three independent experiments). Statistical analyses were performed using Student's t-test. **(D)** Immunoblotting of PKR and p-eIF2 $\alpha$  (Ser51) in HEK293T cells expressing  $(C_4G_2)_{108RO}$  together with control or PKR siRNA. GAPDH was used

Figure 4 continued on next page



*Figure 4 continued*

as a loading control. **(E)** Representative images of FMRP staining in HEK293T cells expressing (C<sub>4</sub>G<sub>2</sub>)<sub>108</sub> repeats together with either control or PKR siRNA. **(F)** Quantification of antisense foci-positive cells with FMRP granules. Error bars represent SD (n = 150 cells/condition and three independent experiments). **(F)** Kaplan–Meier curves showing the risk of cell death in (C<sub>4</sub>G<sub>2</sub>)<sub>108</sub>RO-expressing neurons compared with 2 repeats in the presence and absence of PKR siRNA (replicated three times with similar results). Statistical analyses were performed using Mantel–Cox test (\*p<0.05, \*\*p<0.01). Scale bars, 20 μm.

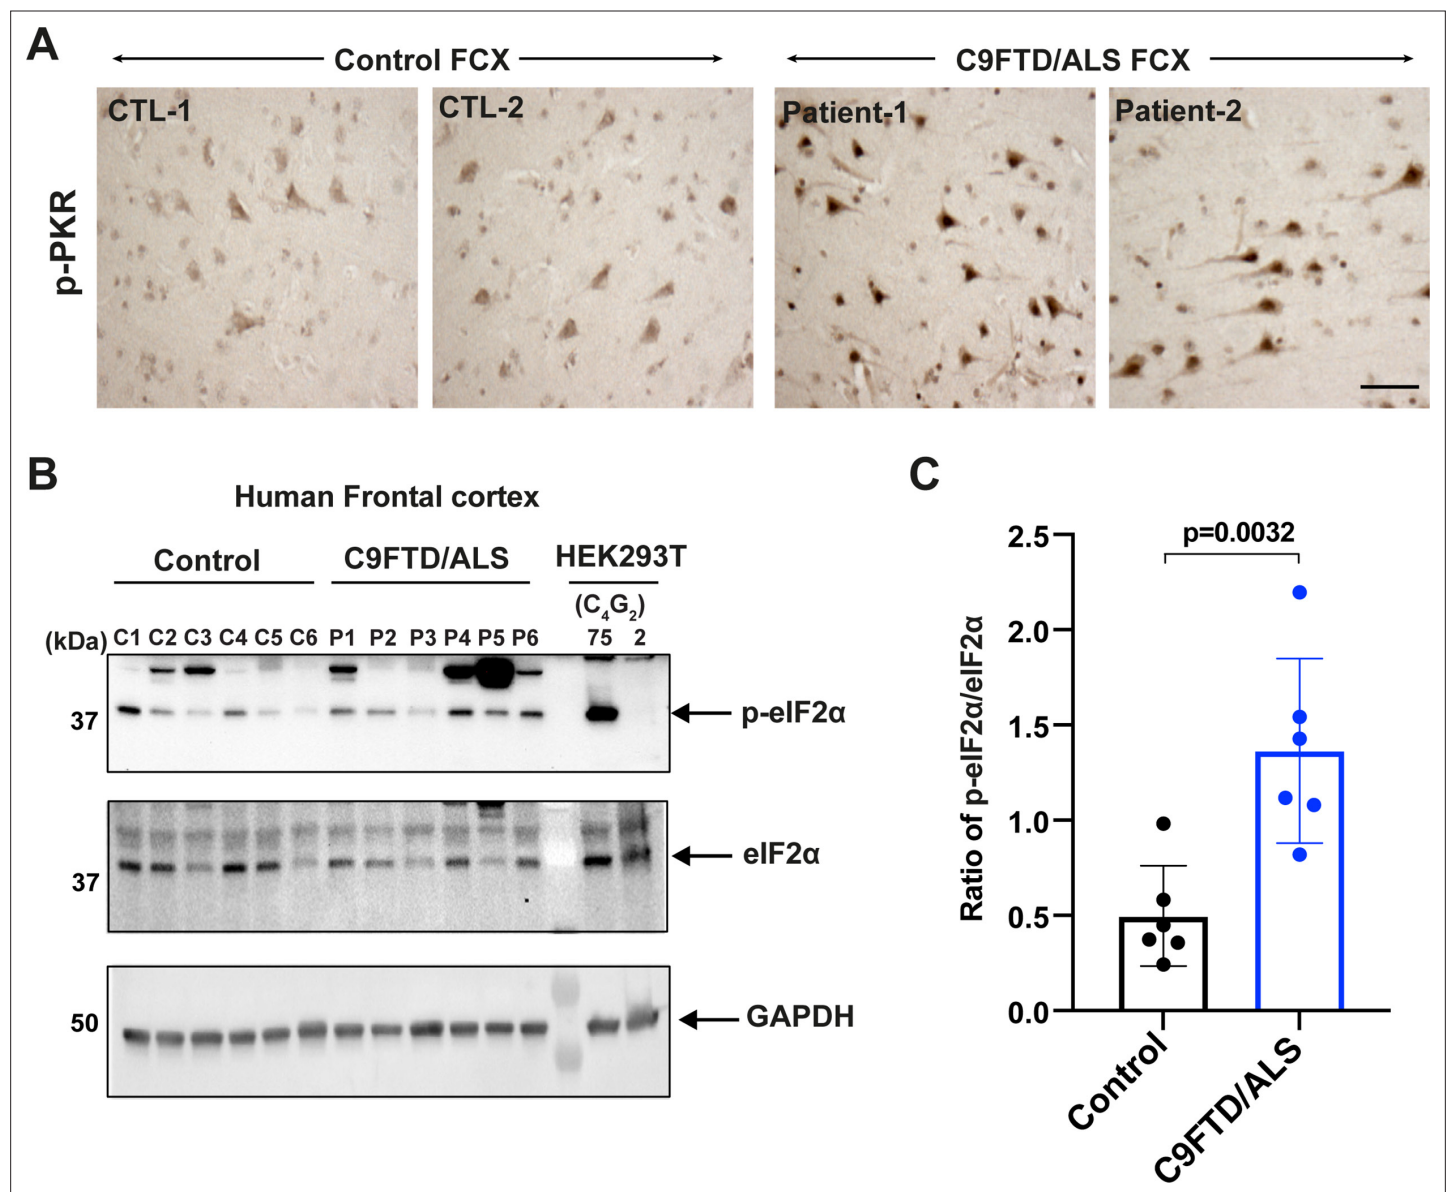

**Figure 5.** Increased levels of phosphorylated PKR and eIF2α in C9FTD/ALS patients. **(A)** Representative immunohistochemistry images of phosphorylated PKR staining in control and C9FTD/ALS patient's frontal cortex (FCX) using anti-p-PKR (T446) (n = 4 per genotype). **(B, C)** Immunoblotting of p-eIF2α in proteins extracted from control (C1–C6) and C9FTD/ALS patient's frontal cortex (P1–P6). p-eIF2α (Ser51) was normalized to total eIF2α. GAPDH was used as a loading control. Error bars represent SD (control n = 6 and C9FTD/ALS n = 6). Statistical analyses were performed using unpaired Student's t-test. Scale bars, 10 μm.

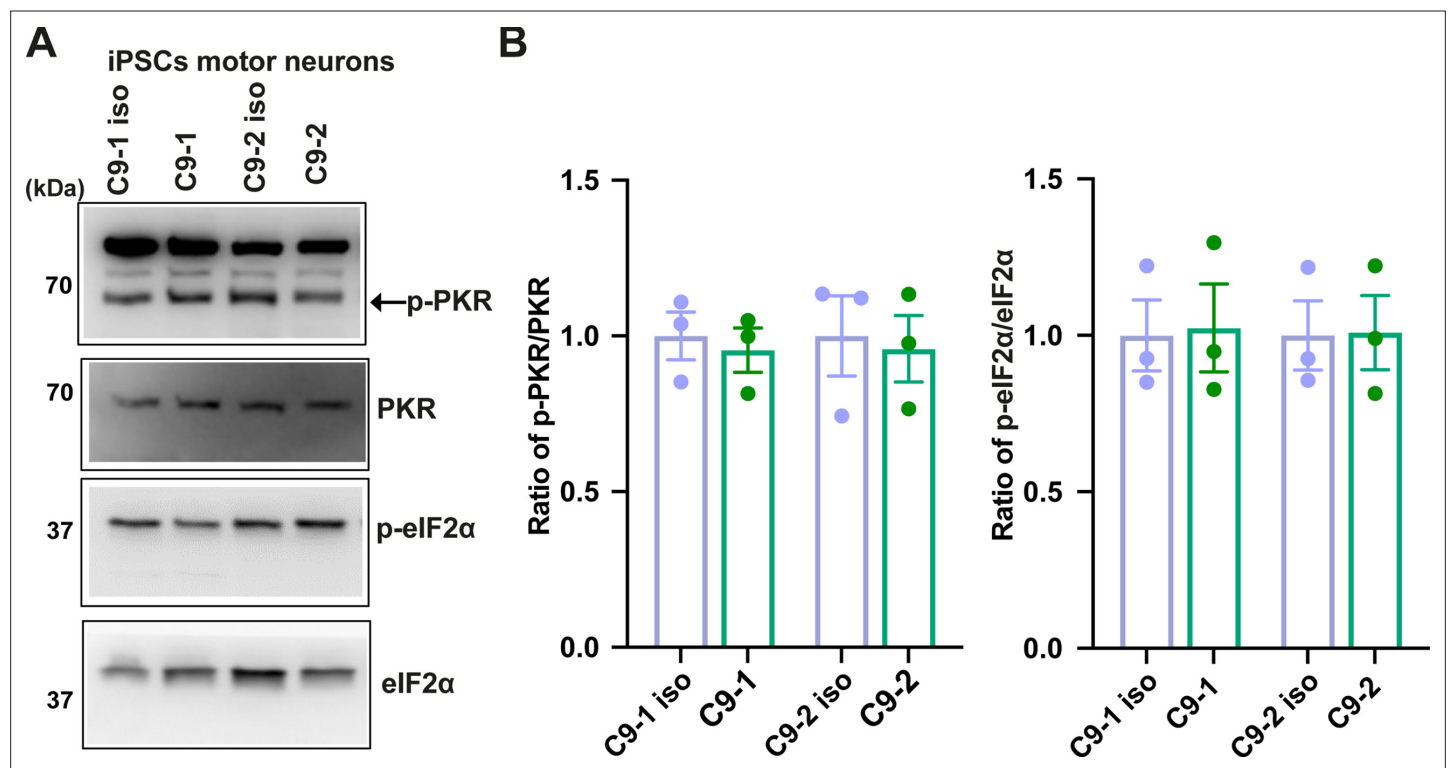

**Figure 5—figure supplement 1.** Phosphorylated PKR and eIF2α levels are unchanged in C9FTD/ALS iPSC-derived motor neurons. **(A)** Immunoblotting and **(B)** quantification of p-PKR and p-eIF2α in two different lines of iPSC-derived motor neurons of C9FTD/ALS patient and their isogenic controls (38 d post differentiation). P-PKR levels were detected using anti-p-PKR (T446) and normalized to total PKR. P-eIF2α levels were detected using anti-phosphor eIF2α (Ser51) and normalized to total eIF2α. Error bars represent SD (n = 3).

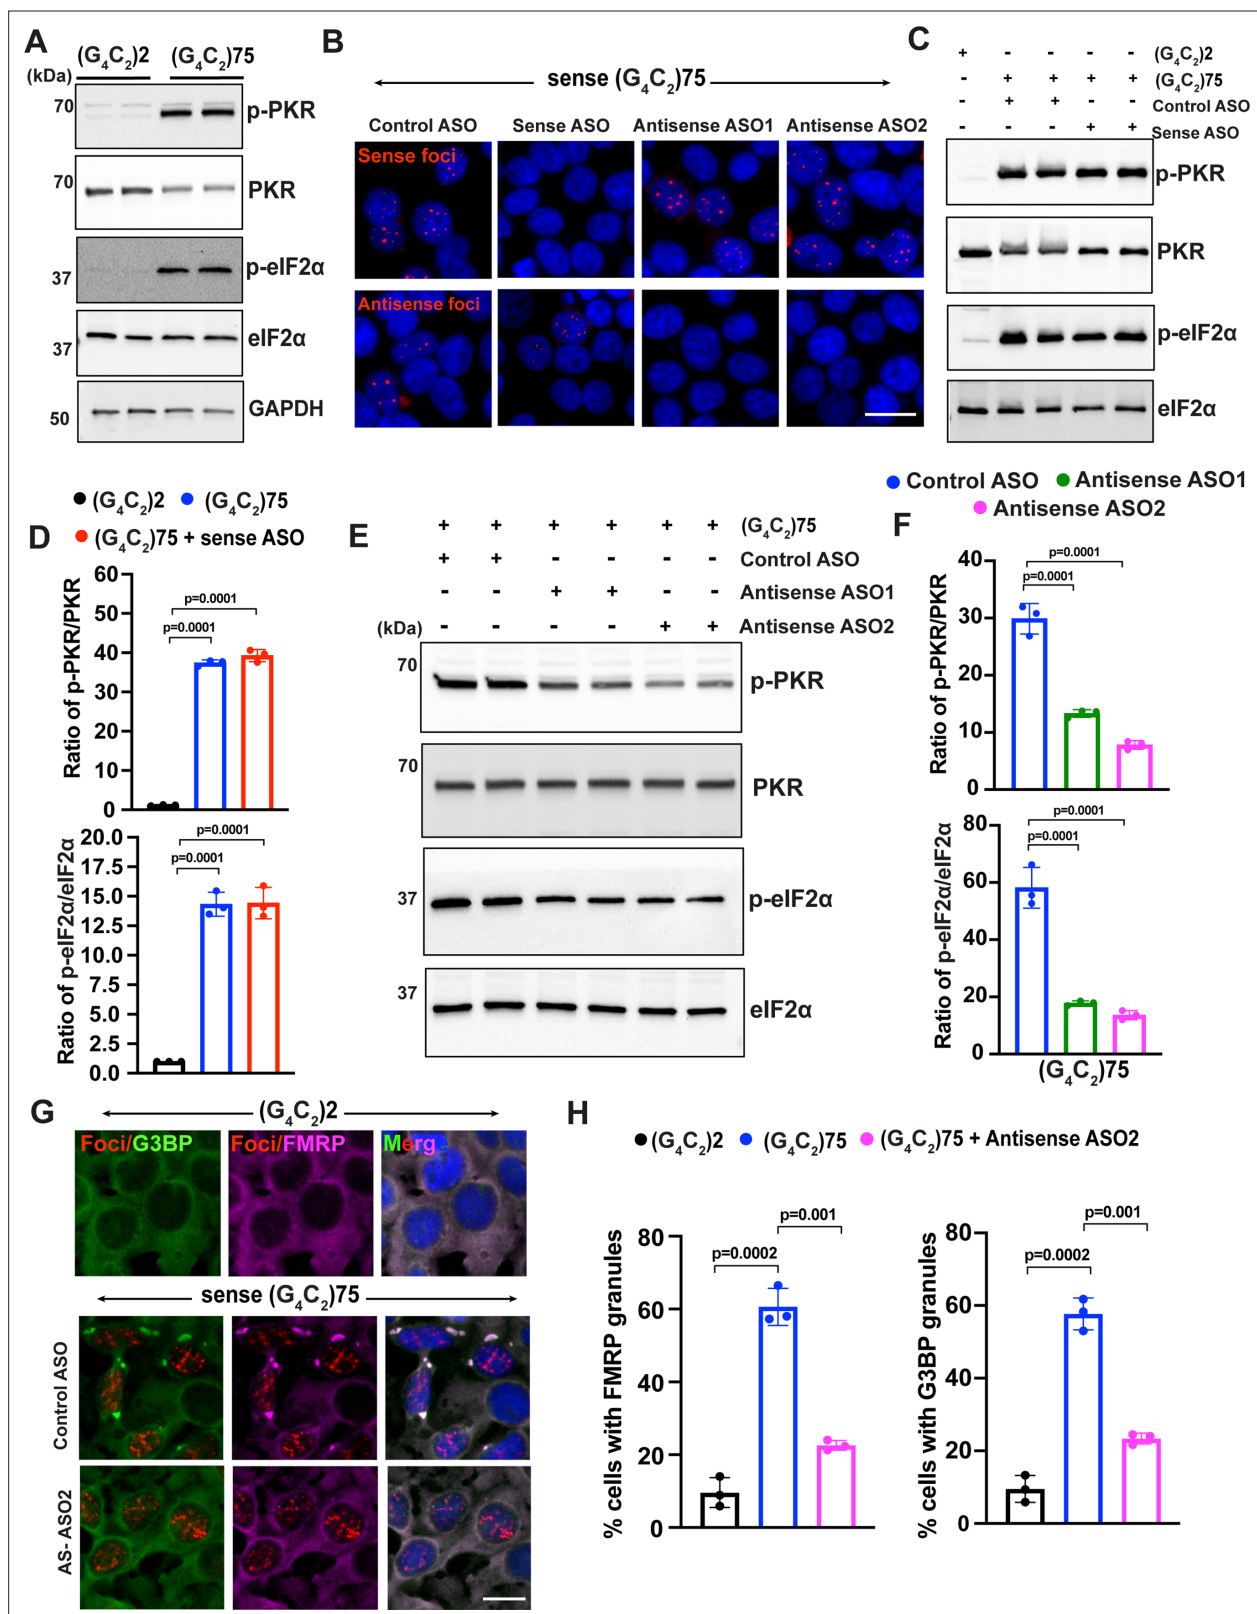

**Figure 6.** Sense G<sub>4</sub>C<sub>2</sub> repeat expanded RNAs cannot activate the PKR/eIF2α pathway. **(A)** Immunoblotting of p-PKR and p-eIF2α in HEK293T cells expressing (G<sub>4</sub>C<sub>2</sub>)<sub>75</sub> or (G<sub>4</sub>C<sub>2</sub>)<sub>2</sub> repeats. **(B)** Representative images of sense and antisense RNA foci in HEK293T cells expressing (G<sub>4</sub>C<sub>2</sub>)<sub>75</sub> repeats together with either control antisense oligonucleotides (ASOs), ASOs targeting sense G<sub>4</sub>C<sub>2</sub> RNAs or ASOs targeting antisense G<sub>4</sub>C<sub>2</sub> repeat expanded RNAs. Foci were detected by RNA FISH. Red, foci; blue, DAPI. **(C)** Immunoblotting and **(D)** quantification of p-PKR and p-eIF2α in HEK293T cells expressing

Figure 6 continued on next page

*Figure 6 continued*

(G<sub>4</sub>C<sub>2</sub>)<sub>75</sub> or (G<sub>4</sub>C<sub>2</sub>)<sub>2</sub> repeats together with either control ASO or ASOs targeting sense G<sub>4</sub>C<sub>2</sub> repeat expanded RNAs. Phosphorylated PKR levels were detected using anti-p-PKR (phosphor T446) and normalized to total PKR. Phosphorylated eIF2 $\alpha$  levels were detected using anti-p-eIF2 $\alpha$  (Ser51) and normalized to total eIF2 $\alpha$ . GAPDH was used as a loading control. Error bars represent SD (n = 3 independent experiments). Statistical analyses were performed using unpaired Student's t-test. **(E, F)** Immunoblotting of p-PKR and p-eIF2 $\alpha$  in HEK293T cells expressing (G<sub>4</sub>C<sub>2</sub>)<sub>75</sub> or (G<sub>4</sub>C<sub>2</sub>)<sub>2</sub> repeats together with either control ASO or ASOs targeting antisense G<sub>4</sub>C<sub>2</sub> repeat expanded RNAs. P-PKR (T446) and p-eIF2 $\alpha$  (Ser51) were normalized to total PKR and eIF2 $\alpha$ , respectively. GAPDH was used as a loading control. Error bars represent SD (n = 3 independent experiments). Statistical analyses were performed using one-way ANOVA with Tukey's post hoc test. **(G)** Representative images and **(H)** quantification of FMRP and G3BP1 staining in HEK293T cells expressing (G<sub>4</sub>C<sub>2</sub>)<sub>75</sub> or (G<sub>4</sub>C<sub>2</sub>)<sub>2</sub> repeats in the presence and absence of antisense ASO2. Error bars represent SD (n = 150 cells/condition and three independent experiments). Statistical analyses were performed using one-way ANOVA with Tukey's post hoc test. Scale bars, 20  $\mu$ m.

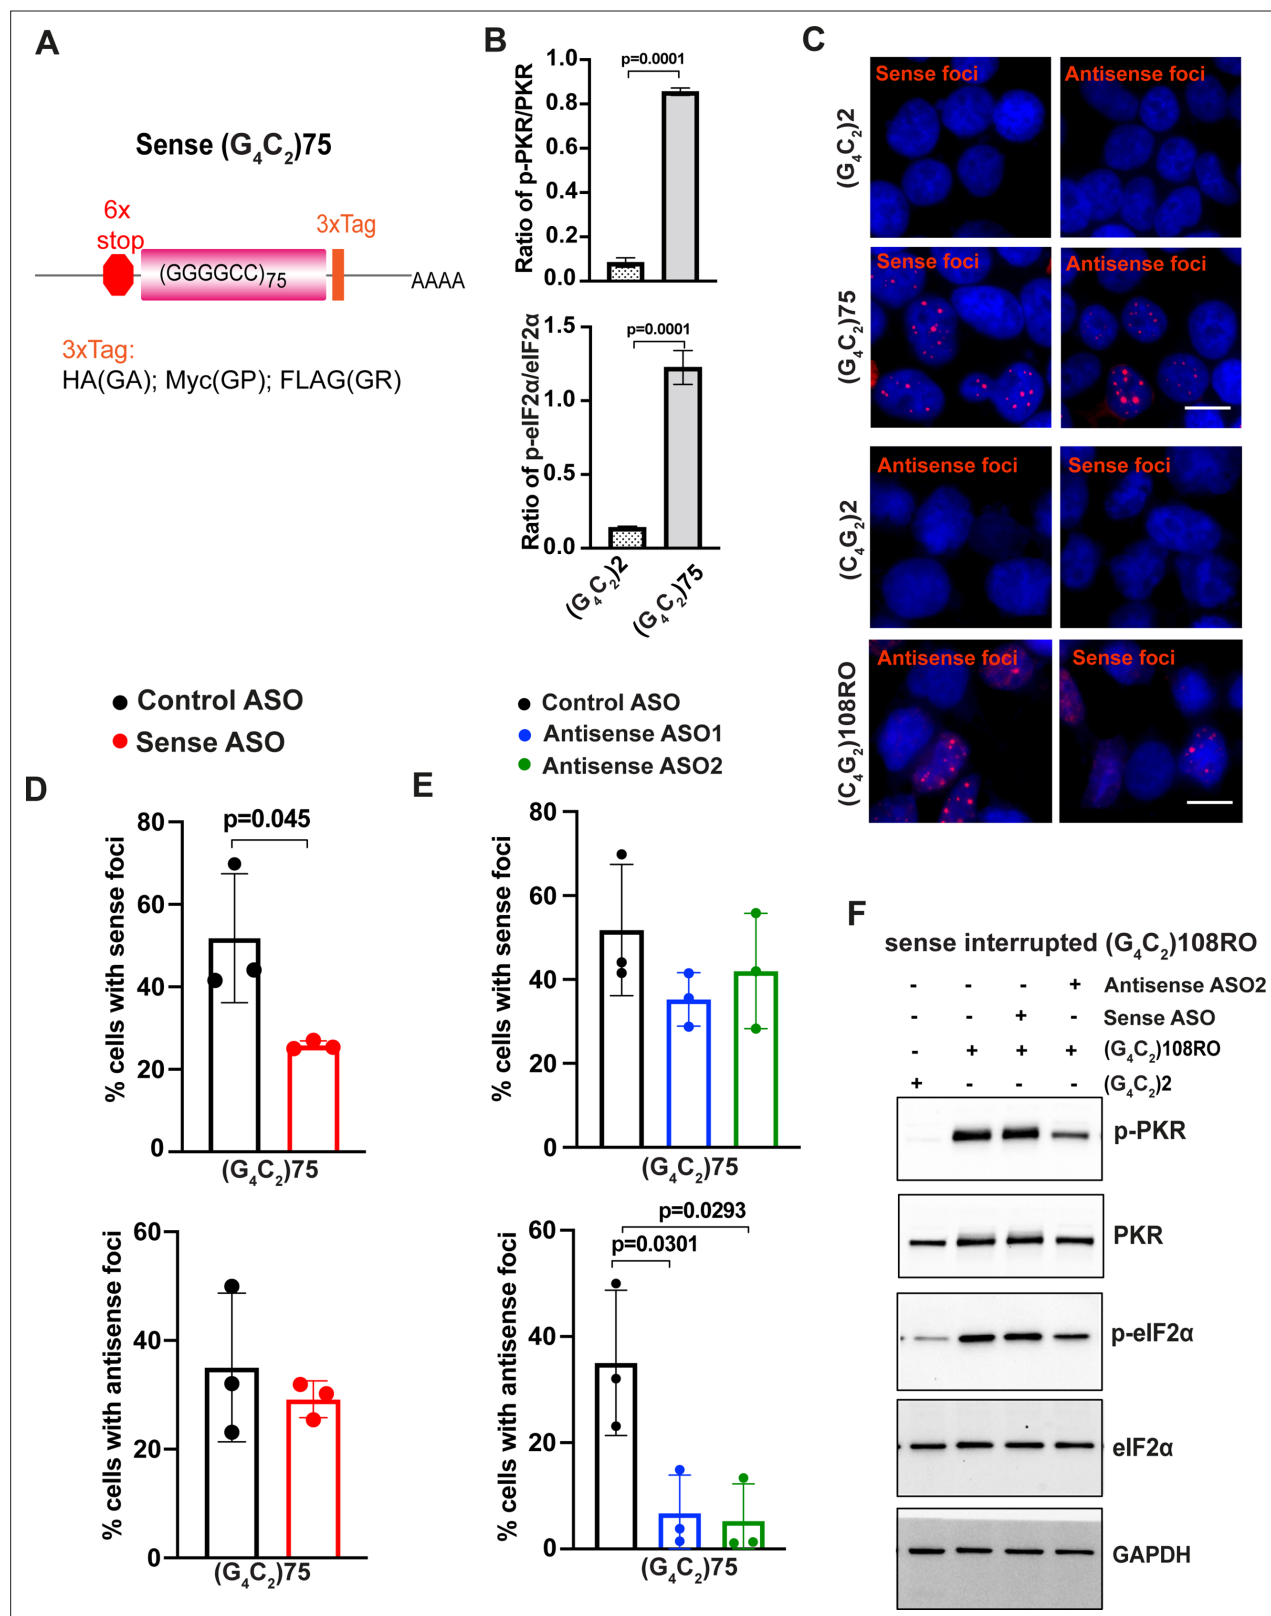

**Figure 6—figure supplement 1.** Sense G<sub>4</sub>C<sub>2</sub> repeat expanded RNAs cannot activate the PKR/eIF2 $\alpha$  pathway. **(A)** Schematic illustration of the sense (G<sub>4</sub>C<sub>2</sub>)<sub>75</sub> repeat construct. **(B)** Quantification of p-PKR and p-eIF2 $\alpha$  in HEK293T cells expressing (G<sub>4</sub>C<sub>2</sub>)<sub>75</sub> or (G<sub>4</sub>C<sub>2</sub>)<sub>2</sub> repeats. p-PKR (T446) and p-eIF2 $\alpha$  (Ser51) were normalized to total PKR and eIF2 $\alpha$ , respectively. GAPDH was used as a loading control. Error bars represent SD (n = 2 independent experiments). Statistical analyses were performed using Student's t-test. **(C)** Representative images of sense and antisense RNA foci in HEK293T cells

Figure 6—figure supplement 1 continued on next page

*Figure 6—figure supplement 1 continued*

expressing sense (G<sub>4</sub>C<sub>2</sub>)<sub>75</sub> and interrupted antisense (C<sub>4</sub>G<sub>2</sub>)<sub>108</sub>RO repeats. Foci were detected by RNA FISH. Red, foci; blue, DAPI. **(D, E)** Quantification of RNA foci in HEK293T expressing (G<sub>4</sub>C<sub>2</sub>)<sub>75</sub> together with either control antisense oligonucleotide (ASO) or ASOs targeting sense G<sub>4</sub>C<sub>2</sub> and antisense C<sub>4</sub>G<sub>2</sub> repeat expanded RNAs. Error bars represent SD (n = 80–100 cells/condition from three independent experiments). **(F)** Immunoblotting of p-PKR and p-eIF2 $\alpha$  in HEK293T cells expressing interrupted sense (G<sub>4</sub>C<sub>2</sub>)<sub>108</sub>RO and control repeats. p-PKR levels were detected using anti-p-PKR (T446) and normalized to total PKR. P-eIF2 $\alpha$  levels were detected using anti-phosphor eIF2 $\alpha$  (Ser51) and normalized to total eIF2 $\alpha$ . Error bars represent. GAPDH was used as a loading control. Error bars represent SD Scale bars, 20  $\mu$ m (HEK293T).

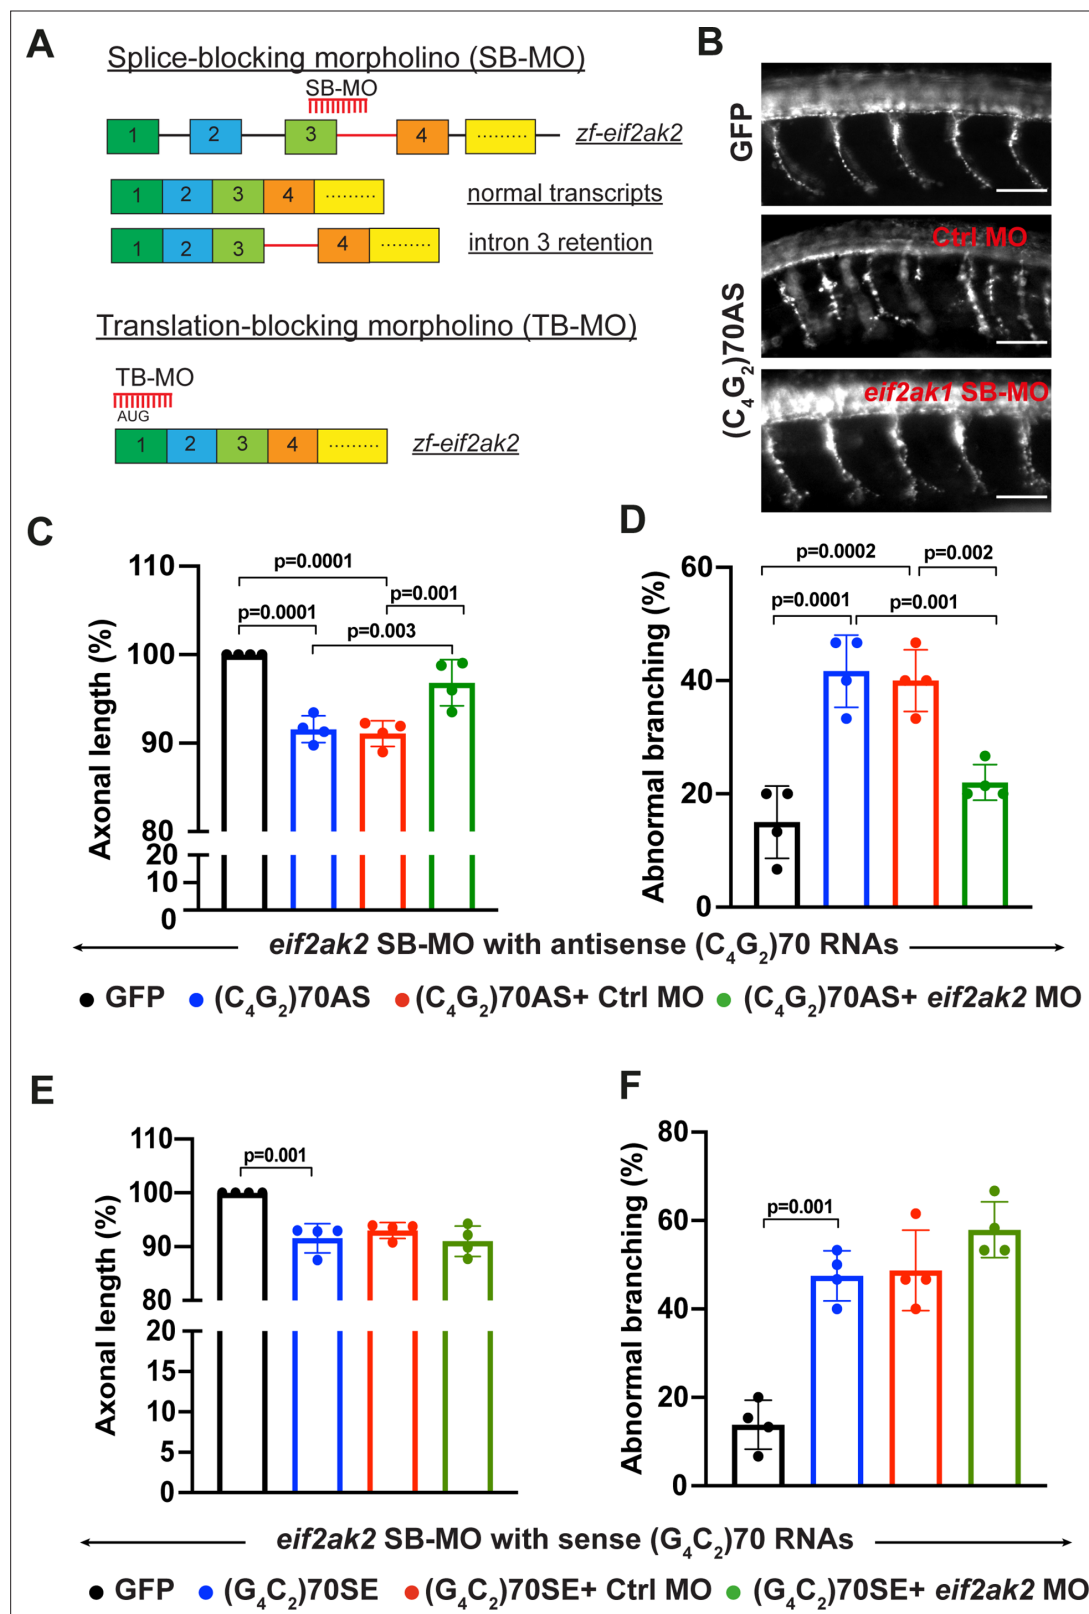

**Figure 7.** Reduction of PKR mitigates antisense C<sub>4</sub>G<sub>2</sub>, but not sense G<sub>4</sub>C<sub>2</sub>, RNA- mediated toxicity in zebrafish. **(A)** Schematic illustration of splice-blocking morpholino (SB-MO) targeting the exon 3/intron 3 junction in zebrafish *eif2ak2* pre-mRNA. The correctly spliced (wild type transcripts) and intron 3 retained transcripts are shown. The translation-blocking morpholino targets the AUG start codon in post-spliced *eif2ak2* mRNA. **(B)** SV2 immunostaining of motor axons in 30 hpf zebrafish embryos injected with GFP control mRNA and antisense (C<sub>4</sub>G<sub>2</sub>)70 RNAs. Scale bar = 50 μm. **(C, D)** Figure 7 continued on next page



*Figure 7 continued*

Effects of SB-MO on axonal length (**C**) and branching (**D**) of zebrafish expressing antisense ( $C_4G_2$ )70 RNAs. Embryos were injected with 0.844  $\mu$ M GFP mRNA, 0.844  $\mu$ M antisense ( $C_4G_2$ )70 RNAs, 0.844  $\mu$ M antisense ( $C_4G_2$ )70 RNAs plus 0.25 mM control morpholino, or 0.844  $\mu$ M antisense ( $C_4G_2$ )70 RNAs plus 0.25 mM *eif2ak2* morpholino. Error bars represent SD (n = 4 independent experiments). Statistical analyses were performed using one-way ANOVA with Tukey's post hoc test. (**E**, **F**) Effects of SB-MO on axonal length and branching of zebrafish expressing sense ( $G_4C_2$ )70 RNAs. Embryos were injected with 0.844  $\mu$ M GFP mRNA, 0.844  $\mu$ M sense ( $G_4C_2$ )70 RNAs, 0.844  $\mu$ M sense ( $G_4C_2$ )70 RNAs plus 0.25 mM control morpholino or 0.844  $\mu$ M sense ( $G_4C_2$ )70 RNAs plus 0.25 mM *eif2ak2* morpholino. Error bars represent SD (n = 4 independent experiments). Statistical analyses were performed using one-way ANOVA with Tukey's post hoc test.

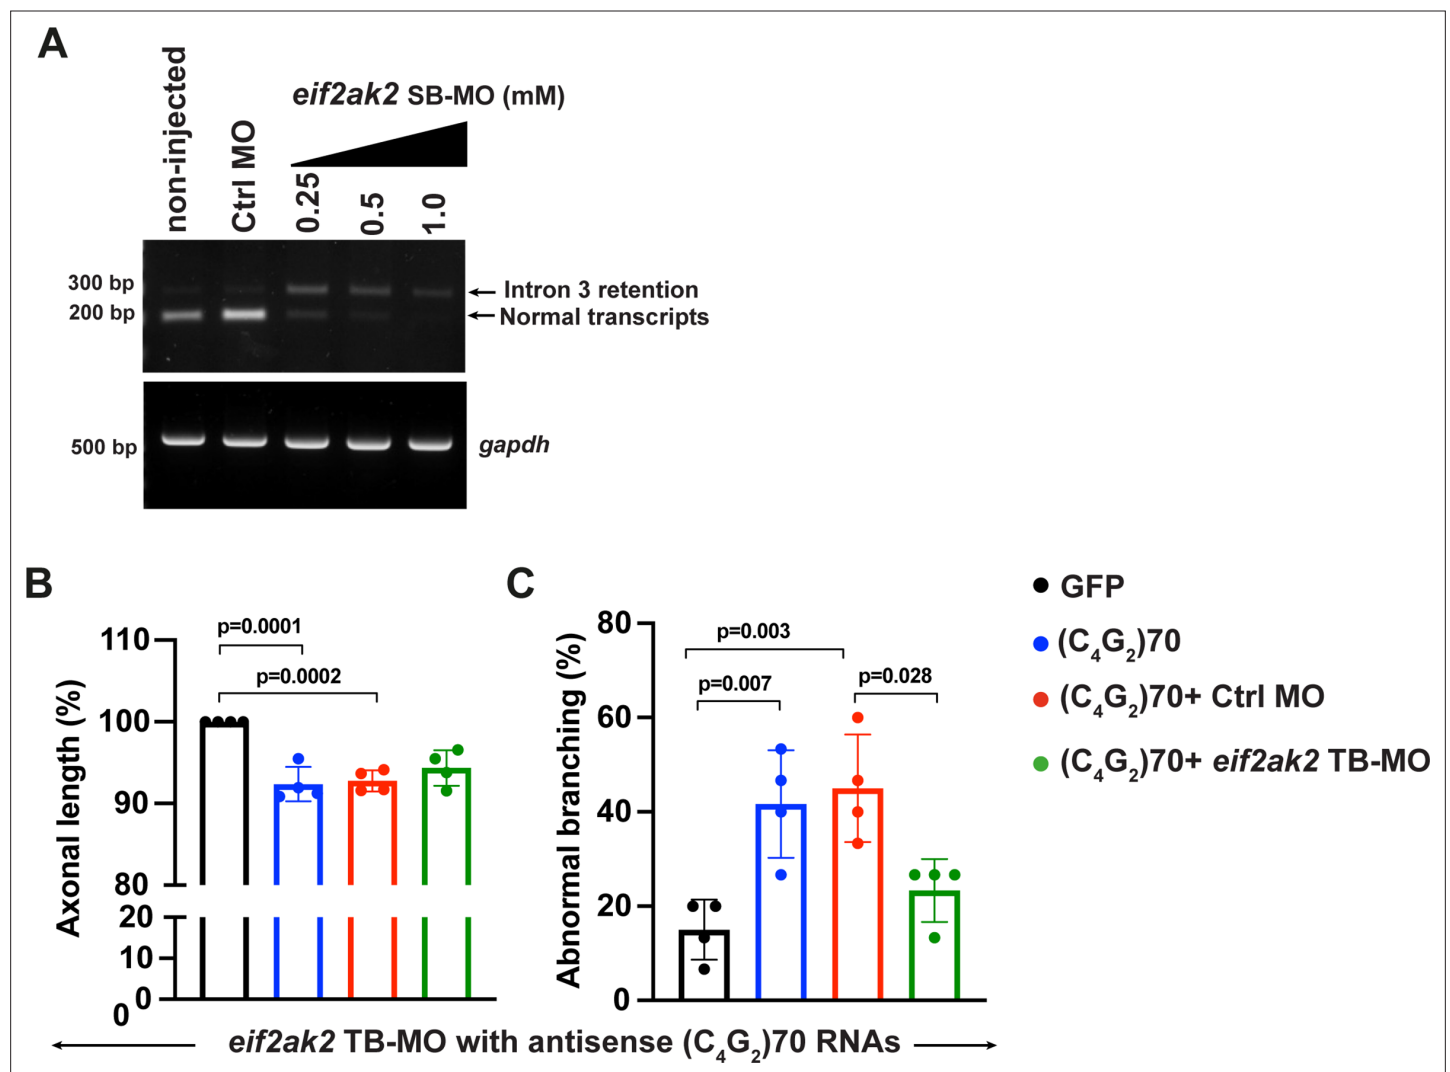

**Figure 7—figure supplement 1.** Translation-blocking morpholino of PKR mitigates antisense  $C_4G_2$  repeat RNA-induced axonopathy in zebrafish. **(A)** Dose-dependent knockdown of WT transcripts and increase of transcripts with intron 3 retention as determined by RT-PCR analysis. *Eif2ak2* splice variants in non-injected, standard control and *eif2ak2* targeting MO-injected embryos 30 hpf are shown. **(B, C)** Effect of translation-blocking morpholino (TB-MO)-mediated reduction of Eif2ak2 on axonal length **(B)** and branching **(C)**, using a dose of 0.25 mM for TB-MO and standard control MO in GFP and antisense ( $C_4G_2$ )70 RNAs expressing zebrafish. Error bars represent SD (n = 4 independent experiments). Statistical analyses were performed using one-way ANOVA with Tukey's post hoc test.

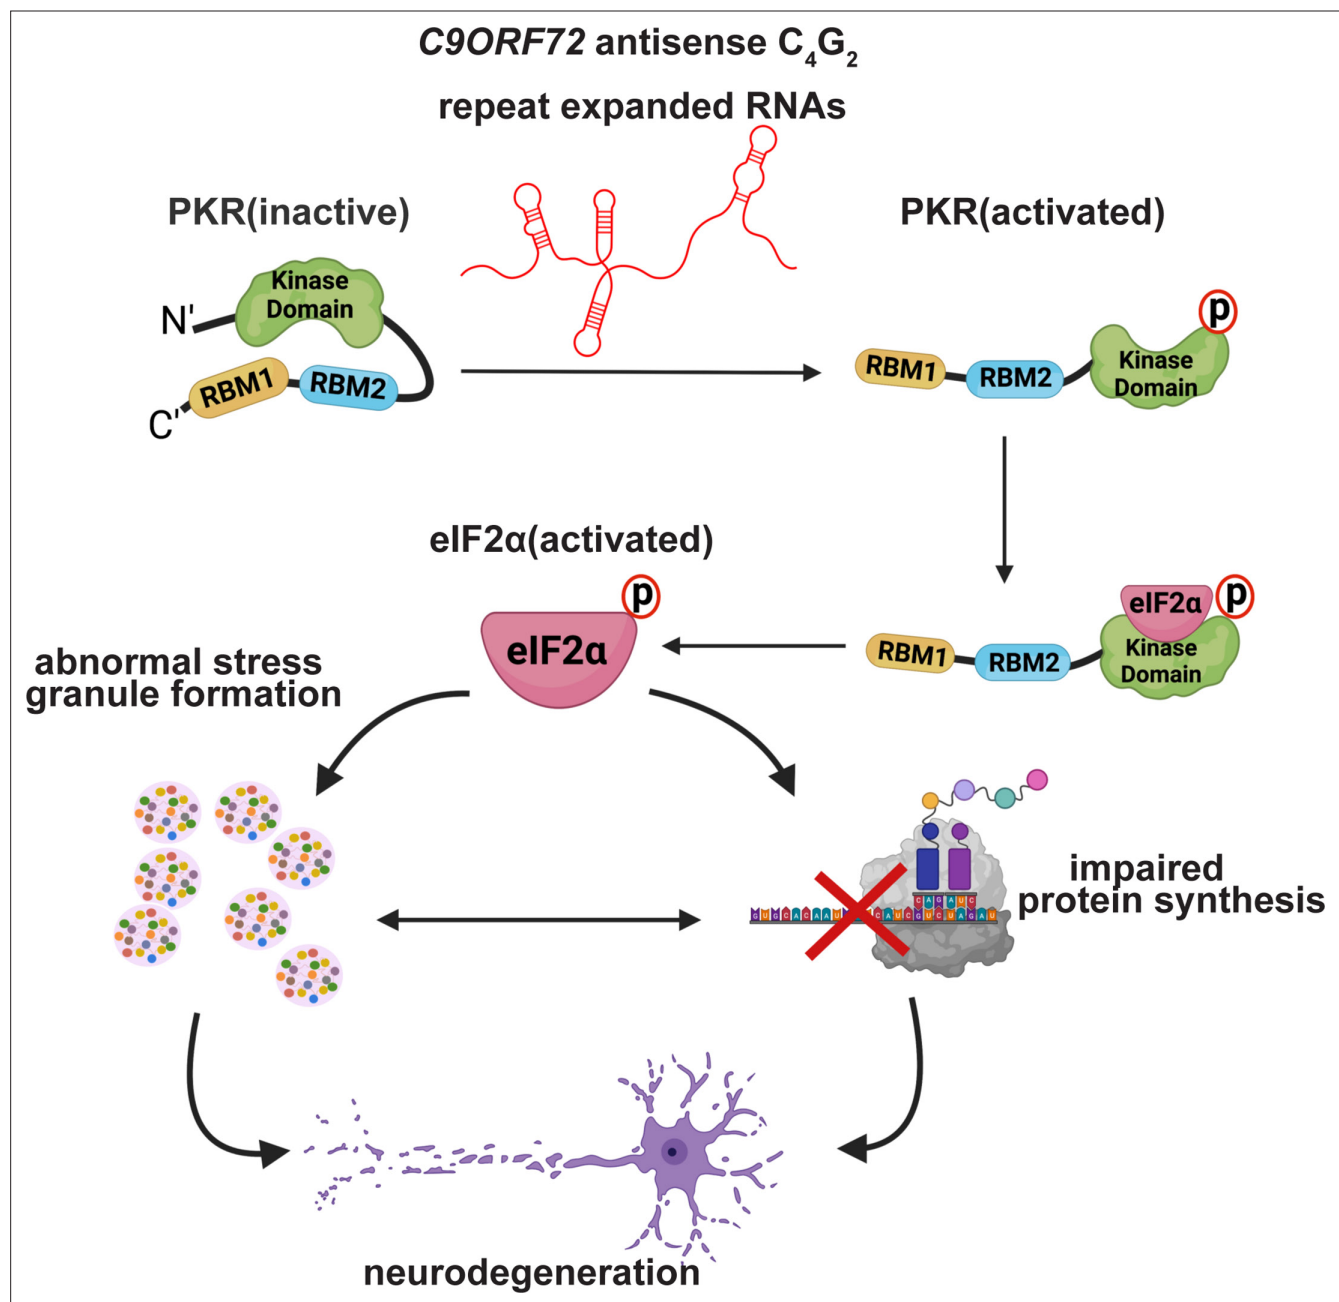

**Figure 8.** Proposed pathogenic mechanisms caused by *C9ORF72* antisense  $C_4G_2$  repeat expanded RNAs. *C9ORF72* antisense  $C_4G_2$  repeat expanded RNAs activate PKR/eIF2α-dependent integrated stress response and lead to neurotoxicity independent of DPR proteins.
